1  
2  
3  
4  
5  
6  
7  
8  
9  
10  
11  
12  
13  
14  
15  
16  
17  
18  
19  
20  
21  
22

## Epigenome-based Splicing Prediction using a Recurrent Neural Network

Donghoon Lee<sup>1,2</sup>, Jing Zhang<sup>1,2</sup>, Jason Liu<sup>2</sup>, and Mark B Gerstein<sup>1,2,3,4\*</sup>

1 Program in Computational Biology and Bioinformatics, Yale University, New Haven, CT  
06520, USA

2 Department of Molecular Biophysics and Biochemistry, Yale University, New Haven, CT  
06520, USA

3 Department of Computer Science, Yale University, New Haven, CT 06520, USA

4 Department of Statistics and Data Science, Yale University, New Haven, CT 06520, USA

\* Corresponding author

E-mail: [pi@gersteinlab.org](mailto:pi@gersteinlab.org)

## 23 **Abstract**

24 Alternative RNA splicing provides an important means to expand metazoan transcriptome  
25 diversity. Contrary to what was accepted previously, splicing is now thought to predominantly  
26 take place during transcription. Motivated by emerging data showing the physical proximity of  
27 the spliceosome to Pol II, we surveyed the effect of epigenetic context on co-transcriptional  
28 splicing. In particular, we observed that splicing factors were not necessarily enriched at exon  
29 junctions and that most epigenetic signatures had a distinctly asymmetric profile around known  
30 splice sites. Given this, we tried to build an interpretable model that mimics the physical layout  
31 of splicing regulation where the chromatin context progressively changes as the Pol II moves  
32 along the guide DNA. We used a recurrent-neural-network architecture to predict the inclusion  
33 of a spliced exon based on adjacent epigenetic signals, and we showed that distinct spatio-  
34 temporal features of these signals were key determinants of model outcome, in addition to the  
35 actual nucleotide sequence of the guide DNA strand. After the model had been trained and tested  
36 (with >80% precision-recall curve metric), we explored the derived weights of the latent factors,  
37 finding they highlight the importance of the asymmetric time-direction of chromatin context  
38 during transcription.

39

## 40 **Author Summary**

41 In humans, only about 2% of the genome is comprised of so-called coding regions and can give  
42 rise to protein products. However, the human transcriptome is much more diverse than the  
43 number of genes found in these coding regions. Each gene can give rise to multiple transcripts  
44 through a process during transcription called alternative splicing. There is a limited  
45 understanding of the regulation of splicing and the underlying splicing code that determines cell-

46 type-specific splicing. Here, we studied epigenetic features that characterize splicing regulation  
47 in humans using a recurrent neural network model. Unlike feedforward neural networks, this  
48 method contains an internal memory state that learns from spatiotemporal patterns – like the  
49 context in language – from a sequence of genomic and epigenetic information, making it better  
50 suited for characterizing splicing. We demonstrated that our method improves the prediction of  
51 splicing outcomes compared to previous methods. Furthermore, we applied our method to 49 cell  
52 types in ENCODE to investigate splicing regulation and found that not only spatial but also  
53 temporal epigenomic context can influence splicing regulation during transcription.

54

## 55 **Introduction**

56 Alternative splicing of pre-messenger RNA plays an integral role in diversifying the  
57 transcriptome. This process is more pervasive in higher eukaryotes and is estimated to affect  
58 approximately 95% of protein-coding genes in humans [1,2]. Accurate characterization of the  
59 process by which multiple functional protein products are produced from a single gene is crucial  
60 for understanding the function of the transcriptome [3].

61 Recent discoveries have revealed that splicing occurs predominantly during transcription in  
62 humans [4–8]. Nascent RNA is almost immediately spliced upon transcription [9,10] and introns  
63 are mostly spliced out during transcript elongation. This timing suggests that the recruitment of  
64 splicing factors and spliceosome assembly, detection of exon-intron boundaries, and modulation  
65 of alternative splicing must occur at the same time scale as transcription [9].

66 Co-transcriptional splicing indicates a key observation that splicing takes place progressively in  
67 the direction of RNA transcription, rather than processed simultaneously after transcription. As a  
68 result, the contexts of guide DNA, nascent RNA, and its immediate folded structure

69 progressively change as RNA polymerase II (Pol II) moves along the guide DNA strand [11] and  
70 may influence splicing regulation. Furthermore, co-transcriptional splicing signifies the physical  
71 proximity of the spliceosome assembly to Pol II and other transcriptional machinery [9]. Pol II  
72 physically interacts with nucleosomes and its histone modifications around them, modulating the  
73 transcription rate [12].  
74 DNA sequence alone may not contain sufficient information to process alternative splicing  
75 deterministically [13]. Djebali et al. [4] and many others have shown that there is an enrichment  
76 of chromatin marks around spliced exons, suggesting the role of epigenetic modifications during  
77 context-dependent modulation of alternative splicing [14,15]. For example, exonic boundaries  
78 are characterized by increased levels of nucleosome density and positioning [16–18], DNA  
79 methylation [19,20], and strong enrichment of specific histone modifications including  
80 H3K36me3, H3K79me1, H2BK5me1, H3K27me1, H3K27me2, and H3K27me3 [16,17,21–23].  
81 In addition, a recent genome-wide survey of alternative splicing showed that DNA methylation  
82 can either enhance or silence exon recognition in a context-dependent manner [24]. Furthermore,  
83 studies have shown that there is significant regulatory crosstalk between histone modifications  
84 during transcriptional elongation [12].  
85 Despite many efforts to characterize the splicing regulatory code both experimentally and  
86 computationally, we have yet to understand how the cell type-specific epigenomic context is  
87 utilized during co-transcriptional splicing. Previous computational methods on splicing have  
88 largely focused on discovering novel splice junctions based on RNA sequencing (RNA-seq)  
89 alignments [25,26], utilizing machine learning approaches [27,28] including deep neural  
90 networks [29]. Only a limited set of tools can model splicing regulation based on genomic  
91 sequences and select RNA features [30–32]. Moreover, studies on splicing regulation have



92 focused heavily on identifying mutations that land within splice sites (SSs), cis-acting splicing  
93 regulatory elements, and trans-acting splicing factors [30,33]. The extent, nature, and effects of  
94 the epigenetic context in splicing regulation remain unsolved.

95 In this study, we propose a new computational approach to characterize the role of epigenetic  
96 modifications during co-transcriptional splicing. To build an interpretable model, we adopted a  
97 recurrent neural network (RNN) architecture, which to some degree resembles the physical  
98 characteristics of co-transcriptional splicing (Figure 1). The model can learn from a temporal  
99 sequence of epigenetic contexts, similar to how epigenetic contexts progressively change as Pol  
100 II moves forward along the guide DNA strand during co-transcriptional splicing. The RNN  
101 model allows us to predict the inclusion of exons based on adjacent DNA sequences and  
102 epigenetic modifications. Moreover, the physical resemblance of the model allows us to interpret  
103 the trained model weight parameters and explore the spatio-temporal links between the guide  
104 DNA elements and the surrounding epigenetic modifications. In summary, we leveraged the  
105 mechanistic properties of co-transcriptional splicing to build an interpretable splicing model, and  
106 we explored the trained model to understand the underlying characteristics of the epigenetic  
107 context during co-transcriptional splicing.

108

## 109 **Results**

110 We first explore the epigenetic data context around known splice sites in depth. We then describe  
111 the model and rationale for applying the specific architecture. Finally, we use the model to  
112 further examine the effect of epigenetic context during co-transcriptional splicing.

113

## 114 **Distinct epigenomic signatures characterize splicing regulation**

115 We studied the epigenetic context of alternative splicing by examining the enrichment of  
116 multiple histone modifications and DNA methylations around the exon-intron boundary. We  
117 mapped the epigenomic signatures around SSs of cassette exons at a base-pair resolution. We  
118 aggregated multiple histone modifications across 49 cell types in ENCODE and observed their  
119 enrichment as a function of distance from SSs (Figure 2A, B, Supplementary Figure 1, 2A, B).  
120 We found the most interesting trend within 100 bp of SSs for both the 3' acceptor and 5' donor.  
121 A strong enrichment pattern of H3K36me3 and H3K27me3 appeared around the exon boundary.  
122 Although studies have demonstrated a role for H3K36me3 in defining the exon-intron boundary  
123 [22,34], the dynamic interplay between other histone modifications has been overlooked. From  
124 the 3' acceptor, peak enrichment occurred around 100 bp into the exon; at the 5' donor, it was  
125 closer, at around 50 bp into the exon. We also observed a slight depletion of H3K27ac and  
126 H3K4me3 marks within 100 bp of the intron at the 3' acceptor SS but not within the 5' donor SS.  
127 Using Mann-Whitney-Wilcoxon tests, we confirmed that the relative elevation and depletion of  
128 epigenetic enrichment at the genomic segment containing the branching site (segment C)  
129 compared to the surrounding exons (Figure 2B, Supplementary Figure 2A, B). As this region  
130 contains a branch site, these histone marks may indicate a role in defining the branch point.  
131

### 132 **Enrichment of RNA-binding factors around splice sites**

133 Alternative splicing regulation is an elaborate process that requires precise coordination of  
134 multiple splicing factors and enzymes. Studies have shown that RNA-binding proteins (RBPs)  
135 facilitate splicing regulation during transcription [35]. For example, the serine/arginine-rich  
136 splicing factor family member SRSF7 binds to poised exons and promotes the inclusion rate  
137 [36][37]. Another member of the serine/arginine-rich splicing factor family, U2AF1, is

138 responsible for mediating the binding of U2 small nuclear ribonucleoprotein to the pre-mRNA  
139 branch site [38]. The recent release of the ENCODE project included enhanced CLIP  
140 experiments (eCLIP) datasets that span 112 RBPs from K562 and HepG2 cell types. As  
141 sequence-specific RBPs have been shown to facilitate splicing regulation in a context-specific  
142 manner [15], we investigated their spatial relationship to both the 5' donor and 3' acceptor  
143 splicing sites. Specifically, we investigated the enrichment of splicing factors (n=29) and their  
144 relative distance to these sites. We observed that, on average, splicing factors show preferential  
145 binding to the intronic side of the splicing site in both 3' acceptor and 5' donor SSs  
146 (Supplementary Figure 2C). Furthermore, we found that splicing factors may show slightly  
147 different patterns in their spatial binding preferences. In particular, hnRNP A1 and SRSF1 were  
148 enriched in the intronic region outside 3' SSs whereas SF3B4 and hnRNP C were enriched in the  
149 exonic region (Figure 2C). At 5' SSs, RBM22 and PRPF8 were bound at the exonic end, which  
150 has been shown to be critical for spliceosome assembly [39,40].

151

## 152 **Correlating epigenomic signatures to exonic expression**

153 We tested whether histone modifications have any effect on inclusion and expression of  
154 alternative exons. We observed a trend where enrichment of H3K36me3 at the exon-intron  
155 boundary was positively correlated with exonic expression, whereas H3K27me3 marks showed  
156 the opposite trend (Figure 3A, B, Supplementary Figure 3). Compared to excluded or nominally  
157 expressed alternative exons, highly expressed spliced exons had statistically significant  
158 enrichment of H3K36me3 and depletion of H3K27me3 at their exon-intron boundary (Figure  
159 3C). The contrasting trend and the correlation of these histone methylations to exonic expression

160 suggest that the splicing code may be directly or indirectly encoded within the epigenomic  
161 context.

162

### 163 **Clustering biosamples based on splicing patterns**

164 Previous studies have shown that various epigenomic marks are correlated across similar tissues  
165 and cell types [41]. It is now widely accepted that the transcriptional regulatory circuitry of a  
166 particular cell type is reflected in its epigenetic landscape. To explore the potential linkage  
167 between epigenetic regulation and tissue-specific splicing, we examined splicing patterns across  
168 49 ENCODE biosamples. Based on a similarity of percent-splice-in (PSI) values for all coding  
169 exons (n=185,405), we clustered biosamples into five categories using hierarchical clustering  
170 (Figure 3D). Splicing patterns were highly correlated among tissue types from the same cell-of-  
171 origin, reproducing similar clustering results based on epigenetic marks. For example, blood-  
172 lineage cell types formed cluster C2 whereas brain and neural cells were clustered in cluster C4.  
173 Moreover, we observed that cancerous cell lines cluster together in cluster C3.

174

175 In addition to using the PSI similarity matrix to cluster cell types into categories, we can project  
176 the cells onto a low-dimensional cell space using principal component analysis (PCA). We  
177 measured alternative splicing patterns in terms of exonic expression level (fragment per kilobase  
178 per million reads mapped, FPKM) across diverse ENCODE cell types and examined how cells  
179 are placed in the context of others. Interestingly, we observed that cancer-related cell lines were  
180 located proximal to each other in the PCA cell space (Supplementary Figure 4).

181

### 182 **Modeling splicing regulation: key characteristics of an RNN architecture**

183 To investigate the latent representation of splicing instruction encoded within the epigenomic  
184 context, we aimed to construct a predictive model of splicing. We opted for an RNN architecture,  
185 which has proven successful in various sequential information processing and prediction tasks  
186 such as natural language processing and translation [42–44], to explore the contribution of the  
187 epigenomic context to the regulation of alternative splicing.

188 We start by describing a simple RNN, which shares many of the features we intend to model. A  
189 simple RNN is made of many recurrent neurons that are sequentially linked to each other. A  
190 neuron at specific time point  $t$  is influenced by previous time point  $t - 1$ , combining some  
191 relationship of the current input  $x_t$  with the previous hidden state  $h_{t-1}$ .

192

$$h_t = f(h_{t-1}, x_t)$$

193

194 where  $h_t$  is hidden state at time  $t$  and  $x_t$  is input variable at time  $t$ . If we suppose the activation  
195 function as a hyperbolic tangent for a simple RNN, the state at time  $t$  can be represented as

196

$$h_t = \tanh(W_h^T h_{t-1} + W_x^T x_t + b)$$

197

198 where  $W_h$  and  $W_x$  are the weight of the hidden state and input variable, respectively, and  $b$  is the  
199 bias vector. The output can be expressed in terms of an output weight matrix,  $W_y$ , and a hidden  
200 state at time  $t$ ,  $h_t$ :

201

$$\hat{y}_t = S(W_y^T h_t)$$

202

203 where  $S$  is sigmoid function:

204

$$S(x) = \frac{e^x}{e^x + 1}$$

205

206 This time-dependency allows us to explore the complex contextual relationship between features.

207 In particular, we adopted the long short-term memory (LSTM) [45] model to describe an RNN

208 architecture. In principal, a simple RNN allows us to model a time-dependent task from

209 sequential data. However, in practice, the simple model suffers from the problem of vanishing

210 gradients, where the gradients responsible for updating weights with respect to the partial

211 derivative of error function becomes negligible in a long sequence and hampers the model from

212 learning long-term time dependencies. Therefore, we used both LSTM and gated recurrent unit

213 (GRU), which have many of the same simple intuitive properties of the simple RNN but allow

214 learning from longer sequences. The LSTM is an extension of the same idea that includes more

215 sophisticated gates, which allows the cell to retain long-term memory between cells while

216 avoiding the problem of vanishing gradients when training the network. The specific equations

217 for the LSTM model we adopted is shown in the Methods.

218

### 219 **Modeling splicing regulation: How the RNN architecture fits the problem**

220 The rationale for applying an RNN to our model is that (1) an RNN is optimized for processing

221 sequential information like genomic sequences and epigenomic profiles along genomic

222 coordinates, (2) an RNN has a time-direction resembling how RNA is transcribed by RNA

223 polymerase in the 5' to 3' direction, (3) temporal memory cells of an RNN allow the model to

224 learn about complex context-dependent relationships among epigenomic features, such as the

225 influence of features and input seen at  $t-1$  on the neural cell at time  $t$ , and (4) an RNN is very  
226 flexible with the type of input and output data and therefore can easily integrate heterogeneous  
227 sequential information. Not surprisingly, researchers recently have applied RNN models to the  
228 area of genomics to predict non-coding DNA function [46] and to detect exon junctions [47].  
229 Moreover, since the mechanics of the RNN calculation is somewhat parallel to the actual spatial  
230 and temporal dependency found in co-transcriptional splicing, the overall results from the trained  
231 model are more readily interpretable. The data processing and implementation of the predictive  
232 models are collected in a package named Epigenome-based Splicing Prediction using Recurrent  
233 Neural Network (ESPRNN; available at <https://github.com/gersteinlab/esprnn>). Using our  
234 method, we attempted to decipher context-dependent effects of various epigenomic features on  
235 splicing for both canonical (e.g., dinucleotide GT for 5' donors and AG for 3' acceptors) and  
236 non-canonical SSs. Our model is especially useful since splicing signals are not only enriched at  
237 the splice site but often found up and downstream of splice sites.

238

### 239 **Modeling splicing regulation: Initial evaluation**

240 We used ESPRNN to predict alternate usages of cassette exons (inclusion or exclusion of exons),  
241 the most common form of alternative splicing events [48], using DNA sequences and  
242 epigenomic signals adjacent to SSs (Figure 4A). We used the exon definition of splicing, which  
243 is considered to be the dominant mechanism in higher eukaryotes [49]. Our model had an  
244 average F1 score (harmonic mean of the precision and recall) of 0.8472 for the LSTM-based  
245 model across cell types [0.8757 for the GRU-based model] using five core histone modification  
246 tracks (Figure 4B). The average F1 score marginally increased to 0.8573 when using 17 histone,  
247 chromatin accessibility, DNA methylation, and nucleosome density profiles.

248 We performed the splicing prediction with or without the RBP profile and measured how much  
249 predictive performance is gained from additional information. We observed a marginal  
250 improvement in predictive performance when RBP binding profiles were added to the baseline  
251 model (measured in improvement of F1 score from 0.84 to 0.86) (Supplementary Figure 9A, B).  
252 This suggests RBP binding information may be redundant and already represented in the  
253 epigenetic features. We also compared prediction results from normal cell types to those from  
254 cancerous cell lines. Since previous studies on cancer-specific alternative splicing [50,51] have  
255 suggested potential linkage of aberrant splicing events to the disease risk [52–55], we expected  
256 to see differences in splicing regulation between normal and cancerous cell types. However, we  
257 did not observe a significant difference in prediction performance between normal and cancerous  
258 cell types (average F1 score for normal biosamples: 0.8465, cancerous biosamples: 0.8765). We  
259 also cross-tested a model trained from one cell type to another. After we fit our model to one cell  
260 type, we transferred the fitted weights and model parameters to predict splicing on other cell  
261 types. When we tested between cell types from the same cell-of-origin (e.g., train on adult liver  
262 model and test on HepG2 data, train on lung model and test on A549 data), we did not observe a  
263 significant difference in predictive performance. However, we observed a moderate reduction in  
264 splicing prediction performance when we cross-tested cells from different cell-of-origin  
265 (Supplementary Figure 5B, F1 score is better metric for comparing cross-cell testing due to class  
266 imbalance across cell types). Thus, the epigenomic regulatory landscape around SSs appears to  
267 be generally conserved across cell types. Moreover, we compared the classification performance  
268 to other models based on random forest and k-nearest neighbors and found that our model was  
269 superior in terms of classification accuracy (Figure 4D, Supplementary Figure 7).



270 We tried to measure the contribution of each individual epigenetic feature to splicing in a  
271 number of ways. (1) We performed an empirical analysis via a leave-one-out strategy. Using  
272 GM12878 as an example, we first built a reference model based on all available epigenetic  
273 features. By removing one variable at a time, we then measured the mean decrease in F1 score  
274 and area under the receiver operating characteristic curve (ROC AUC), as an indicator of  
275 variable importance (Figure 4C). (2) Alternatively, we trained a DNA-only model using DNA  
276 sequence features only and compared to a "baseline model." The baseline model was trained  
277 using DNA sequence features plus additional chromatin accessibility (DHS) and 6 histone marks.  
278 Here, we observed a significant loss of predictive performance in the DNA-only model (13%  
279 reduction in F1 score) (Supplementary Figure 6A). (3) Next, starting from the DNA-only model,  
280 we added one epigenetic feature at a time to measure the information gain from each feature  
281 (Supplementary Figure 6B). While the addition of some epigenetic features like H3K27ac  
282 increased the variability in prediction performance, an active mark H3K36me3 or a repressive  
283 mark H3K27me3 was the most informative at predicting splicing. Moreover, the combination of  
284 both H3K36me3 and H3K27ac further improved the prediction performance compared to other  
285 pairs (Supplementary Figure 6C). We observed that the combination of H3K36me3 and  
286 H3K27ac features together contributed more than when they were used individually  
287 (Supplementary Figure 6D).

288 Overall, we found H3K36me3 to be the most important variable in predicting splicing. This  
289 observation coincides with previous studies reporting that H3K36me3 recruits the splicing  
290 factors PTB [34] and SRSF1 [56] to facilitate splicing. Interestingly, one of the top predictors of  
291 splicing was H3K79me2, which was previously shown to associate with H3K36me3 at gene

292 bodies [57]. H3K9me3, a histone modification that can recruit adaptor proteins like HP1 to  
293 facilitate splicing factors [24], was also ranked among the top predictors.

294

### 295 **Interpretation of weights of the splicing model**

296 Since the model follows the physical layout of splicing regulation, one can examine the trained  
297 model and learn from the trained weights how each epigenetic feature contributes to splicing  
298 regulation. To interpret the splicing model, we designed an LSTM-based model composed of  
299 only one hidden state and trained for a longer period (400 epochs). We made sure that this  
300 simplified model performs nearly as well at predicting splicing as our main model (usually after  
301 >20 epochs of training, Supplementary Figure 8A). We also made sure that the overall predictive  
302 performance of the simplified model is stable after approximately 100 epochs (Supplementary  
303 Figure 8B, C). When we analyzed the simplified model, we found that the trained weights of  
304 various gates at the recurrent unit showed that open chromatin (DHS), H3K27ac, K3K36me3,  
305 and H3K4me1 are weighted more highly than other epigenetic features -- as expected  
306 (Supplementary Figure 8D). We also noticed that H3K27me3 and K3K9me3 were negatively  
307 weighted at the input gate, suggesting that these features have a negative impact on exon  
308 inclusion, consistent with our previous findings.

309

### 310 **Influence of temporal epigenetic context on splicing regulation**

311 We specifically designed our splicing model to represent the physical layout of splicing  
312 regulation, where a sequence of chromatin contexts is fed progressively to the model. Therefore,  
313 the model takes into account the temporal direction (progression from 5' to 3' in direction). To  
314 show that model has learned this asymmetric temporal relationship of epigenetic features, we

315 first trained a baseline model (in the normal 5' to 3' direction) and then fed a series of epigenetic  
316 signals in a “reverse” order (3' to 5' in direction) as input to it. We examined how the model  
317 prediction behaved in this context. If the model was agnostic to the temporal direction of features,  
318 both forward and reverse input features should give the same predictive power. By using a model  
319 based on a single histone feature, H3K36me3, we observed a moderate decrease in prediction  
320 performance upon reversal of the epigenetic feature (Supplementary Figure 9), with an F1 score  
321 decreasing from 0.78 to 0.77 and ROC AUC decreasing from 0.87 to 0.85. While we suspect  
322 there are some level of redundancy across different epigenetic marks and some marks are  
323 independent of their temporal direction, our results suggest the importance of temporal direction  
324 of epigenetic features in the context of splicing.

325

## 326 **Discussion**

327 Our prediction model revealed that the epigenomic signature of an SS plays a large role in  
328 determining the splicing outcome. In addition, the positive results suggest that our model can be  
329 extended to predict the full transcriptomic composition from a genomic and epigenomic context.  
330 We expect that we could further improve the proposed model by adding more deep hidden layers  
331 and increasing the number of training samples by utilizing the full set of available epigenomic  
332 data in the ENCODE project. Our approach does contain some limitations, as it is still  
333 challenging to visualize and evaluate the multi-dimensional context of the weight matrix in the  
334 trained model. We could apply dimensionality reduction techniques to probe the latent  
335 representation of relationships between various epigenomic signals.

336 In this study, we used ENCODE polyA RNA-seq assays to measure splicing and exon-level  
337 expression; we note that this is an indirect measure of what is actually happening during

338 transcription. RNAs are often unstable and may be subjected to many post-transcriptional  
339 modifications. RNA-seq measures the steady-state level of the transcript, accounting for both  
340 mRNA synthesis and decay. Future studies with a more direct measure of transcriptional rates,  
341 such as nuclear run-on assays like global run-on (GRO-seq) or bromouridine sequencing (Bru-  
342 seq), will allow us to accurately measure the effect of epigenomic context on splicing and,  
343 ultimately, on the transcriptional rate.

344 Future studies should focus on comparing splicing models from normal and cancer samples in  
345 the hope of illuminating the differences in the epigenomic landscapes of splicing regulation.

346 Although splicing is an elaborate process, it could become pathogenic when misregulated [58,59].  
347 Unsurprisingly, aberrant splicing events, which collectively referred to splicing events that could  
348 confer the risk of a disease, are often implicated in systemic diseases like cancer [51,60].

349 Aberrant splicing events based on mutations are relatively well characterized [54,60–62];  
350 however, a large fraction of aberrant splicing events that have no direct mutational cause still  
351 remain unknown. Although our understanding of epigenomic context on splicing regulation is  
352 incomplete, our prediction model highlights that splicing is elaborately regulated via various  
353 epigenomic signatures. This suggests that epigenomic dysregulation may be closely linked to the  
354 onset of aberrant splicing. Thus, even though aberrantly spliced RNAs in healthy cells may be  
355 degraded by the mRNA surveillance system, epigenomic dysregulation may render this  
356 checkpoint system useless. Further studies on cell-type-specific and context-dependent splicing  
357 regulation will reveal whether epigenetic modulation can serve as a therapeutic method of  
358 complex disease in the future.

359

360 **Methods**

## 361 **Dataset**

362 The current release of the ENCODE dataset provides an unprecedented number of functional  
363 assays across broad biosample types, including primary cells and tissues. In this study, we  
364 leveraged both the breadth and depth of ENCODE, including assays for histone modification  
365 (chromatin immunoprecipitation sequencing, ChIP-seq), chromatin accessibility (DNase I  
366 hypersensitive sites sequencing, DNase-seq), RBPs (eCLIP), methylations (WGBS and RRBS)  
367 and gene expression (RNA-seq), to systematically probe the data-rich context of alternative  
368 splicing and its regulation. The list of accessions for experiments used in this study is found in  
369 Supplementary Table 1.

370

## 371 **Processing of RNA-seq data**

372 To quantify levels of exon expression from RNA-seq data, we collected all raw sequencing reads  
373 from experiments tagged as reference epigenome series from the ENCODE portal. These reads  
374 were polyA plus long RNA-seq (200 bp or larger) from whole-cell fractions rather than nuclear  
375 or cytosolic fractions. To minimize potential batch effects and sample bias, we carefully selected  
376 untreated experiments from the reference epigenome series. As of November 2019, there are 81  
377 cell and tissue types (covering 49 unique biosamples) in the reference epigenome series,  
378 including both RNA-seq and ChIP-seq of H3K4me1, H3K4me3, H3K36me3, H3K27ac,  
379 H3K27me3, and H3K9me3. We first aligned all RNA-seq data to the GRCh38 genome using  
380 RNA STAR (v 2.7.0). Since the model requires splice site annotation, we constructed exon  
381 annotation from GENCODE version 24 (to synchronize with ENCODE annotation) by extracting  
382 all unique exons with known protein-coding transcripts. We excluded exons that could  
383 ambiguously map to both chromosome X and Y. This analysis included 597,937 exons (185,405

384 unique exons after removing duplicates from isoforms) that averaged 28.01 exons per gene and  
385 296.49 bp in length (150.92 bp in length for unique exons). We obtained read counts at each  
386 exon using HTSeq (v0.11.2) [63]. Based on read counts, we used a custom script  
387 (esprnn/preproc\_calcExonFPKM.py) to calculate normalized exonic expression levels in FPKM.  
388 Our rationale for using the exonic expression was to intentionally make the model agnostic to the  
389 overall transcript level. Each exon was evaluated independently from other exons, and we  
390 counted the number of sequencing reads supporting the inclusion of a particular exon. The  
391 counts were normalized similar to how a gene's expression is normalized by size of annotation  
392 and total number of mapped reads (FPKM). We binarized the exonic expression level (FPKM)  
393 using a threshold of one. Therefore, we only considered whether an exon has enough evidence  
394 supporting exon inclusion.

395

396 In addition to the exonic expression level, alternatively, we calculated a metric, PSI, to measure  
397 the level of splicing. PSI represents the fraction of the reads supporting exon inclusion from the  
398 split reads at the splice junction. We used a custom script (esprnn/scripts/calcPSI.sh) based on  
399 equations from Schafer et al. [64] to calculate PSI normalized by the size of read and exon  
400 annotation.

401

$$\tilde{F}_i^{incl} = \frac{F_i^{incl}}{L_i + L_f}$$

$$\tilde{F}_i^{excl} = \frac{F_i^{excl}}{L_f}$$

$$PSI (\Psi) = \frac{\tilde{F}_i^{incl}}{\tilde{F}_i^{incl} + \tilde{F}_i^{excl}} \%$$

402

403  $F_i^{incl}$  number of reads or fragments supporting the inclusion of  $i$ -th exon;  $F_i^{excl}$  number of reads  
404 or fragments supporting the exclusion of  $i$ -th exon;  $L_f$  fragment length;  $L_i$  size of  $i$ -th exon. We  
405 used PSI cutoffs of 20% and 80% to determine skipping and inclusion of exons based on the  
406 overall PSI distribution (Supplementary Figure 10).

407

### 408 **RNA-binding proteins**

409 RBP enrichment was calculated based on the peaks identified from the eCLIP experiments. We  
410 downloaded the ENCODE eCLIP uniformly processed peaks from K562 and HepG2 cell types  
411 (see Supplementary Table 1 for eCLIP data accession). The peak was called using CLIPPER  
412 software [65] and filtered for peaks having a score of 1,000. We then counted numbers of RBP  
413 binding events at a base-pair resolution, agnostic to cell type.

414 To examine preferential binding patterns of splicing factors around SSs, RBP peaks were  
415 annotated as splicing-related factors if they belong to hnRNP- and SR-families (n=29). We  
416 extended both 3' acceptor and 5' donor SS by 1,000 bp in both up and downstream direction and  
417 binned the region into 100 bp intervals. We defined the position relative to the distance to the SS,  
418 in the 5' to 3' direction. For each interval, we calculated the frequency of splicing factor binding  
419 normalized to the size of the interval. The value of RBP enrichment means the normalized  
420 binding frequency of splicing-related factors.

421

### 422 **LSTM model**

423 We adopted the following equations for the modeling of splicing using LSTM.  $\sigma$  function  
424 denotes sigmoid function.  $\otimes$  denotes Hadamard product where two matrices are multiplied in a

425 pair-wise fashion.  $x_t$  denotes input vector and  $h_t$  denotes output vector,  $f_t$  denotes forget gate  
426 vector,  $i_t$  denotes input or update gate vector,  $o_t$  denotes output gate vector,  $c_t$  denotes cell state  
427 vector.

428

$$\begin{aligned}f_t &= \sigma(W_{hf}^T h_{t-1} + W_{xf}^T x_t + b_f) \\i_t &= \sigma(W_{hi}^T h_{t-1} + W_{xi}^T x_t + b_i) \\o_t &= \sigma(W_{ho}^T h_{t-1} + W_{xo}^T x_t + b_o) \\g_t &= \tanh(W_{hg}^T h_{t-1} + W_{xg}^T x_t + b_g) \\c_t &= f_t \otimes c_{t-1} + i_t \otimes g_t \\h_t &= o_t \otimes \tanh(c_t)\end{aligned}$$

429

### 430 GRU model

431 We adopted the following equations for the modeling of splicing using GRU.  $x_t$  denotes input  
432 vector and  $h_t$  denotes output vector,  $z_t$  denotes update gate vector and  $r_t$  denotes reset gate  
433 vector.

434

$$\begin{aligned}z_t &= \sigma(W_{hz}^T h_{t-1} + W_{xz}^T x_t + b_z) \\r_t &= \sigma(W_{hr}^T h_{t-1} + W_{xr}^T x_t + b_r) \\h_t &= (1 - z_t)h_{t-1} \otimes + z_t \otimes \tanh(W_{hh}^T (r_t \otimes h_{t-1}) + W_{xh}^T x_t + b_h)\end{aligned}$$

435

### 436 Pre-processing of data for the training model

437 We selected six normal and three cancer samples from the reference epigenome series. The  
438 dataset contains consolidated epigenomes from the Roadmap Epigenomics Consortium [41] and



439 the ENCODE Consortium. All datasets were uniformly processed and mapped to the GRCh38  
440 human reference genome. All samples contained a core set of histone modification tracks  
441 (H3K4me1, H3K4me3, H3K36me3, H3K27ac, H3K27me3, and H3K9me3) as well as RNA-seq  
442 data. We used additional histone modification tracks, as well as DNase I hypersensitivity, DNA  
443 methylation, and nucleosome positioning tracks, to predict alternative splicing upon availability.  
444 Detailed information on datasets used can be found in Supplementary Table 1. For each exon, we  
445 obtained DNA sequences at intron-exon boundaries (3' acceptors) and exon-intron boundaries (5'  
446 donors), as well as 100 bp upstream and downstream of SSs. Splice junctions included both  
447 canonical and non-canonical SSs. We processed all sequences to read in the 5' to 3' direction  
448 using strand information from each gene. Each 400 bp DNA sequence was encoded into a 1,000  
449 by 4 binary array using one-hot encoding. We used RNA-seq expression profiles to indicate  
450 tissue-specific alternative splicing patterns. Genes having fewer than two exons were discarded  
451 and the first and last exons were excluded from the analysis. We classified an exon as being  
452 expressed if its FPKM was greater than or equal to 1. We normalized all ChIP-seq histone  
453 modification tracks and DNase-seq tracks over corresponding input signal tracks using MACS  
454 v2.0.10 (<https://github.com/taoliu/MACS>) [66]. We used negative log<sub>10</sub> of the Poisson p-value  
455 to measure the enrichment level over the background. Due to the wide dynamic range observed,  
456 we used a p-value threshold of 1e-2 for the upper limit. We processed all feature tracks including  
457 DNA methylation and nucleosome signal tracks to read in the 5' to 3' direction and scaled them  
458 to a range of 0 to 1.

459

460 **Performance evaluation of the model**

461 There is no single metric that can give you a measure of performance in a binary classification  
462 problem. Relying on one metric can be misleading especially when there is high class imbalance.  
463 Therefore, we employed various metrics to measure the performance of the predictive model.  
464 ROC curve explains the tradeoff between true-positive rate (TPR) and false-positive rate (FPR).  
465 PR curve visualizes the tradeoff between positive predictive value (PPV) and true-positive rate  
466 (TPR).  
467

$$Precision = \frac{tp}{tp + fp}$$

$$Recall = \frac{tp}{tp + fn}$$

$$Accuracy = \frac{tp + tn}{tp + tn + fp + fn}$$

468  
469 In addition, we used F1-score, which is the harmonic mean of precision and recall, to measure  
470 the performance of the splicing model.

$$F_1 = 2 \cdot \frac{precision \cdot recall}{precision + recall}$$

471  
472 **Hyperparameter tuning of splicing model and training**  
473 We tested a range of dimensions and depths of RNN models and network design  
474 hyperparameters to optimize the alternative splicing model. We chose optimal hyperparameters  
475 by tuning one parameter at a time while fixing the rest. Hyperparameters included but were not  
476 limited to the number of recurrent layers, size of neurons in each layer, pooling strategy, dropout  
477 rate, choice of activation function and loss function, optimizer, and number of the epoch. We

478 shuffled the order of the data and split the dataset into training and test sets using an 80 to 20%  
479 ratio. 20% of test data was set aside for the performance evaluation. 80% of training data was  
480 split again between 80 to 20% (64 and 16% of the original data) for fitting the model and  
481 validating the model fit during the training phase. We fed a range of sequences from 50 to 1,000  
482 bp within each SS and found the 400 bp span to be the ideal size for the model. For the neural  
483 network architecture, we achieved the best result when two RNN units were stacked together,  
484 which allowed the model to learn higher-level temporal representations. We used a hidden state  
485 size of two by default and we recommend not using a hidden state size greater than 128 to avoid  
486 overfitting problems (Supplementary Figure 8A). We applied three variants of the RNN model,  
487 LSTM [45], GRU [67], and simple RNN. To compare the performance of memory-based units  
488 (LSTM and GRU), we implemented a simple RNN model using the same network architecture.  
489 We found that both LSTM and GRU were capable of learning long-term dependencies and were  
490 effective in learning high-dimensional contextual relationships between epigenomic features  
491 around the SSs. We split the input sequences into two parts where the first half represented a 3'  
492 acceptor SS and the latter half represented a 5' donor SS. We fed these sequences into two  
493 separate RNN units of size 200 and merged them into another RNN unit of size 400. The last  
494 RNN layer was followed by a dropout layer to prevent overfitting of the training dataset. The last  
495 fully-connected layer contained the softmax activation function for classifying exons as either  
496 spliced or unspliced. To train the model, we used a binary cross-entropy objective function with  
497 the Adam optimizer [68]. For each dataset, we trained the model for 20 epochs. We tested the  
498 implementation of ESPRNN using TensorFlow v2.0 (<https://www.tensorflow.org>). Our  
499 implementation also works with Keras v1.0.3 or v2.2.4 (<https://github.com/fchollet/keras>) with

500 either TensorFlow v1.15 and Theano v0.8.2 [69] backend with a minor tweak. We used various  
501 Nvidia GPUs (Titan K20m, K80, GTX 1080ti, RTX2080, P100, and Titan V) to train the model.

502

### 503 **Acknowledgements**

504 We would like to acknowledge Steve Weston from the Yale Center for Research Computing for  
505 technical support in setting up our GPU computing infrastructure.

506

### 507 **References**

- 508 1. Wang ET, Sandberg R, Luo S, Khrebtkova I, Zhang L, Mayr C, et al. Alternative isoform  
509 regulation in human tissue transcriptomes. *Nature*. 2008;456: 470–6.  
510 doi:10.1038/nature07509
- 511 2. Pan Q, Shai O, Lee LJ, Frey BJ, Blencowe BJ. Deep surveying of alternative splicing  
512 complexity in the human transcriptome by high-throughput sequencing. *Nat Genet*.  
513 2008;40: 1413–5. doi:10.1038/ng.259
- 514 3. Graveley BR. Alternative splicing: Increasing diversity in the proteomic world. *Trends in*  
515 *Genetics*. 2001. pp. 100–107. doi:10.1016/S0168-9525(00)02176-4
- 516 4. Djebali S, Davis CA, Merkel A, Dobin A, Lassmann T, Mortazavi A, et al. Landscape of  
517 transcription in human cells. *Nature*. 2012;489: 101–108. doi:10.1038/nature11233
- 518 5. Listerman I, Sapra AK, Neugebauer KM. Cotranscriptional coupling of splicing factor  
519 recruitment and precursor messenger RNA splicing in mammalian cells. *Nat Struct Mol*  
520 *Biol*. 2006;13: 815–822. doi:10.1038/nsmb1135
- 521 6. Wada Y, Ohta Y, Xu M, Tsutsumi S, Minami T, Inoue K, et al. A wave of nascent  
522 transcription on activated human genes. *Proc Natl Acad Sci*. 2009;106: 18357–18361.  
523 doi:10.1073/pnas.0902573106
- 524 7. Ameer A, Zaghlool A, Halvardson J, Wetterbom A, Gyllensten U, Cavelier L, et al. Total  
525 RNA sequencing reveals nascent transcription and widespread co-transcriptional splicing  
526 in the human brain. *Nat Struct Mol Biol*. 2011;18: 1435–1440. doi:10.1038/nsmb.2143
- 527 8. Girard C, Will CL, Peng J, Makarov EM, Kastner B, Lemm I, et al. Post-transcriptional  
528 spliceosomes are retained in nuclear speckles until splicing completion. *Nat Commun*.  
529 2012;3: 994. doi:10.1038/ncomms1998
- 530 9. Carrillo Oesterreich F, Herzelt L, Straube K, Hujer K, Howard J, Neugebauer KM.  
531 Splicing of Nascent RNA Coincides with Intron Exit from RNA Polymerase II. *Cell*.  
532 2016;165: 372–381. doi:10.1016/j.cell.2016.02.045
- 533 10. Alpert T, Herzelt L, Neugebauer KM. Perfect timing: splicing and transcription rates in  
534 living cells. *Wiley Interdisciplinary Reviews: RNA*. Blackwell Publishing Ltd; 2017.  
535 doi:10.1002/wrna.1401
- 536 11. Herzelt L, Ottoz DSM, Alpert T, Neugebauer KM. Splicing and transcription touch base:  
537 Co-transcriptional spliceosome assembly and function. *Nature Reviews Molecular Cell*

- 538 Biology. Nature Publishing Group; 2017. pp. 637–650. doi:10.1038/nrm.2017.63
- 539 12. Tanny JC. Chromatin modification by the RNA polymerase II elongation complex.  
540 Transcription. 2014;5. doi:10.4161/21541264.2014.988093
- 541 13. Tilgner H, Knowles DG, Johnson R, Davis CA, Chakraborty S, Djebali S, et al. Deep  
542 sequencing of subcellular RNA fractions shows splicing to be predominantly co-  
543 transcriptional in the human genome but inefficient for lncRNAs. *Genome Res.* 2012;22:  
544 1616–1625. doi:10.1101/gr.134445.111
- 545 14. Motta-Mena LB, Heyd F, Lynch KW. Context-Dependent Regulatory Mechanism of the  
546 Splicing Factor hnRNP L. *Mol Cell.* 2010;37: 223–234. doi:10.1016/j.molcel.2009.12.027
- 547 15. Fu X-DD, Ares M. Context-dependent control of alternative splicing by RNA-binding  
548 proteins. *Nat Rev Genet.* 2014;15: 689–701. doi:10.1038/nrg3778
- 549 16. Andersson R, Enroth S, Rada-Iglesias A, Wadelius C, Komorowski J. Nucleosomes are  
550 well positioned in exons and carry characteristic histone modifications. *Genome Res.*  
551 2009;19: 1732–1741. doi:10.1101/gr.092353.109
- 552 17. Schwartz S, Meshorer E, Ast G. Chromatin organization marks exon-intron structure. *Nat*  
553 *Struct Mol Biol.* 2009;16: 990–995. doi:10.1038/nsmb.1659
- 554 18. Tilgner H, Nikolaou C, Althammer S, Sammeth M, Beato M, Valcárcel J, et al.  
555 Nucleosome positioning as a determinant of exon recognition. *Nat Struct Mol Biol.*  
556 2009;16: 996–1001. doi:10.1038/nsmb.1658
- 557 19. Shukla S, Kavak E, Gregory M, Imashimizu M, Shutinoski B, Kashlev M, et al. CTCF-  
558 promoted RNA polymerase II pausing links DNA methylation to splicing. *Nature.*  
559 2011;479: 74–9. doi:10.1038/nature10442
- 560 20. Lev Maor G, Yearim A, Ast G. The alternative role of DNA methylation in splicing  
561 regulation. *Trends Genet.* 2015;31: 274–280. doi:10.1016/j.tig.2015.03.002
- 562 21. Hon G, Wang W, Ren B. Discovery and annotation of functional chromatin signatures in  
563 the human genome. Segal E, editor. *PLoS Comput Biol.* 2009;5: e1000566.  
564 doi:10.1371/journal.pcbi.1000566
- 565 22. Kolasinska-Zwierz P, Down T, Latorre I, Liu T, Liu XS, Ahringer J. Differential  
566 chromatin marking of introns and expressed exons by H3K36me3. *Nat Genet.* 2009;41:  
567 376–381. doi:10.1038/ng.322
- 568 23. Spies N, Nielsen CB, Padgett RA, Burge CB. Biased Chromatin Signatures around  
569 Polyadenylation Sites and Exons. *Mol Cell.* 2009;36: 245–254.  
570 doi:10.1016/j.molcel.2009.10.008
- 571 24. Yearim A, Gelfman S, Shayevitch R, Melcer S, Glaich O, Mallm JP, et al. HP1 Is  
572 Involved in Regulating the Global Impact of DNA Methylation on Alternative Splicing.  
573 *Cell Rep.* 2015;10: 1122–1134. doi:10.1016/j.celrep.2015.01.038
- 574 25. Trapnell C, Pachter L, Salzberg SL. TopHat: Discovering splice junctions with RNA-Seq.  
575 *Bioinformatics.* 2009;25: 1105–1111. doi:10.1093/bioinformatics/btp120
- 576 26. Au KF, Jiang H, Lin L, Xing Y, Wong WH. Detection of splice junctions from paired-end  
577 RNA-seq data by SpliceMap. *Nucleic Acids Res.* 2010;38: 4570–4578.  
578 doi:10.1093/nar/gkq211
- 579 27. Pertea M, Lin X, Salzberg SL. GeneSplicer: a new computational method for splice site  
580 prediction. *Nucleic Acids Res.* 2001;29: 1185–90. doi:10.1093/nar/29.5.1185
- 581 28. Sonnenburg S, Schweikert G, Philips P, Behr J, Rättsch G. Accurate splice site prediction  
582 using support vector machines. *BMC Bioinformatics.* 2007;8: S7. doi:10.1186/1471-2105-  
583 8-S10-S7

- 584 29. Jaganathan K, Kyriazopoulou Panagiotopoulou S, McRae JF, Darbandi SF, Knowles D, Li  
585 YI, et al. Predicting Splicing from Primary Sequence with Deep Learning. *Cell*. 2019;0:  
586 535-548.e24. doi:10.1016/j.cell.2018.12.015
- 587 30. Barash Y, Calarco JA, Gao W, Pan Q, Wang X, Shai O, et al. Deciphering the splicing  
588 code. *Nature*. 2010;465: 53–59. doi:10.1038/nature09000
- 589 31. Xiong HY, Barash Y, Frey BJ. Bayesian prediction of tissue-regulated splicing using  
590 RNA sequence and cellular context. *Bioinformatics*. 2011;27: 2554–2562.  
591 doi:10.1093/bioinformatics/btr444
- 592 32. Barash Y, Vaquero-Garcia J, González-Vallinas J, Xiong HY, Gao W, Lee LJ, et al.  
593 AVISPA: a web tool for the prediction and analysis of alternative splicing. *Genome Biol*.  
594 2013;14: R114. doi:10.1186/gb-2013-14-10-r114
- 595 33. Cartegni L, Chew SL, Krainer AR. Listening to silence and understanding nonsense:  
596 exonic mutations that affect splicing. *Nat Rev Genet*. 2002;3: 285–298.  
597 doi:10.1038/nrg775
- 598 34. Luco RF, Pan Q, Tominaga K, Blencowe BJ, Pereira-Smith OM, Misteli T. Regulation of  
599 alternative splicing by histone modifications. *Science* (80- ). 2010;327: 996–1000.  
600 doi:10.1126/science.1184208
- 601 35. Witten JT, Ule J. Understanding splicing regulation through RNA splicing maps. *Trends*  
602 *Genet*. 2011;27: 89–97. doi:10.1016/j.tig.2010.12.001
- 603 36. Lareau LF, Inada M, Green RE, Wengrod JC, Brenner SE. Unproductive splicing of SR  
604 genes associated with highly conserved and ultraconserved DNA elements. *Nature*.  
605 2007;446: 926–929. doi:10.1038/nature05676
- 606 37. Pervouchine D, Popov Y, Berry A, Borsari B, Frankish A, Guigó R. Integrative  
607 transcriptomic analysis suggests new autoregulatory splicing events coupled with  
608 nonsense-mediated mRNA decay. *Nucleic Acids Res*. 2019;47: 5293–5306.  
609 doi:10.1093/nar/gkz193
- 610 38. Ruskin B, Zamore PD, Green MR. A factor, U2AF, is required for U2 snRNP binding and  
611 splicing complex assembly. *Cell*. 1988;52: 207–219. doi:10.1016/0092-8674(88)90509-0
- 612 39. Rasche N, Dybkov O, Schmitzová J, Akyildiz B, Fabrizio P, Lührmann R. Cwc2 and its  
613 human homologue RBM22 promote an active conformation of the spliceosome catalytic  
614 centre. *EMBO J*. 2012;31: 1591. doi:10.1038/EMBOJ.2011.502
- 615 40. Wickramasinghe VO, González-Porta M, Perera D, Bartolozzi AR, Sibley CR, Hallegger  
616 M, et al. Regulation of constitutive and alternative mRNA splicing across the human  
617 transcriptome by PRPF8 is determined by 5' splice site strength. *Genome Biol*. 2015;16:  
618 201. doi:10.1186/s13059-015-0749-3
- 619 41. Consortium RE, Kundaje A, Meuleman W, Ernst J, Bilenky M, Yen A, et al. Integrative  
620 analysis of 111 reference human epigenomes. *Nature*. 2015;518: 317–330.  
621 doi:10.1038/nature14248
- 622 42. Graves A, Mohamed A, Hinton G. Speech Recognition with Deep Recurrent Neural  
623 Networks. *IEEE Int Conf Acoust Speech Signal Process*. 2013; 6645–6649.  
624 doi:10.1109/ICASSP.2013.6638947
- 625 43. Cho K, van Merriënboer B, Gulcehre C, Bahdanau D, Bougares F, Schwenk H, et al.  
626 Learning Phrase Representations using RNN Encoder-Decoder for Statistical Machine  
627 Translation. *Proc 2014 Conf Empir Methods Nat Lang Process*. 2014; 1724–1734.  
628 doi:10.3115/v1/D14-1179
- 629 44. Bahdanau D, Cho K, Bengio Y. Neural Machine Translation By Jointly Learning To



- 630 Align and Translate. Iclr 2015. 2014; 1–15. doi:10.1146/annurev.neuro.26.041002.131047
- 631 45. Hochreiter S, Schmidhuber J, Hochreiter S, Schmidhuber J, Schmidhuber J. Long short-  
632 term memory. *Neural Comput.* 1997;9: 1735–80. doi:10.1162/neco.1997.9.8.1735
- 633 46. Quang D, Xie X. DanQ: A hybrid convolutional and recurrent deep neural network for  
634 quantifying the function of DNA sequences. *Nucleic Acids Res.* 2016;44: gkw226.  
635 doi:10.1093/nar/gkw226
- 636 47. Lee B, Lee T, Na B, Yoon S. DNA-Level Splice Junction Prediction using Deep  
637 Recurrent Neural Networks. *arXiv e-prints.* 2015; 1–6. Available:  
638 <http://arxiv.org/abs/1512.05135>
- 639 48. Koscielny G, Texier V Le, Gopalakrishnan C, Kumanduri V, Riethoven JJ, Nardone F, et  
640 al. ASTD: The Alternative Splicing and Transcript Diversity database. *Genomics.* 2009;93:  
641 213–220. doi:10.1016/j.ygeno.2008.11.003
- 642 49. Keren H, Lev-Maor G, Ast G. Alternative splicing and evolution: diversification, exon  
643 definition and function. *Nat Rev Genet.* 2010;11: 345–55. doi:10.1038/nrg2776
- 644 50. Liu S, Cheng C. Alternative RNA splicing and cancer. *Wiley Interdiscip Rev RNA.*  
645 2013;4: 547–566. doi:10.1002/wrna.1178
- 646 51. Oltean S, Bates DO. Hallmarks of alternative splicing in cancer. *Oncogene.* 2014;33:  
647 5311–5318. doi:10.1038/onc.2013.533
- 648 52. Jiang P, Freedman ML, Liu JS, Liu XS. Inference of transcriptional regulation in cancers.  
649 *Proc Natl Acad Sci U S A.* 2015. doi:10.1073/pnas.1424272112
- 650 53. Ntziachristos P, Abdel-Wahab O, Aifantis I. Emerging concepts of epigenetic  
651 dysregulation in hematological malignancies. *Nature Immunology.* 2016.  
652 doi:10.1038/ni.3517
- 653 54. Jung H, Lee D, Lee J, Park D, Kim YJ, Park W-Y, et al. Intron retention is a widespread  
654 mechanism of tumor-suppressor inactivation. *Nat Genet.* 2015;47: 1242–1248.  
655 doi:10.1038/ng.3414
- 656 55. Obeng EA, Ebert BL. Charting the “Splice” Routes to MDS. *Cancer Cell.* 2015.  
657 doi:10.1016/j.ccell.2015.04.016
- 658 56. Pradeepa MM, Sutherland HG, Ule J, Grimes GR, Bickmore WA. Psp1/Ledgf p52 Binds  
659 Methylated Histone H3K36 and Splicing Factors and Contributes to the Regulation of  
660 Alternative Splicing. Reik W, editor. *PLoS Genet.* 2012;8: e1002717.  
661 doi:10.1371/journal.pgen.1002717
- 662 57. Huff JT, Plocik AM, Guthrie C, Yamamoto KR. Reciprocal intronic and exonic histone  
663 modification regions in humans. *Nat Struct Mol Biol.* 2010;17: 1495–1499.  
664 doi:10.1038/nsmb.1924
- 665 58. Venables JP. Aberrant and alternative splicing in cancer. *Cancer Research.* 2004. pp.  
666 7647–7654. doi:10.1158/0008-5472.CAN-04-1910
- 667 59. Tazi J, Bakkour N, Stamm S. Alternative splicing and disease. *Biochimica et Biophysica*  
668 *Acta - Molecular Basis of Disease.* 2009. pp. 14–26. doi:10.1016/j.bbadis.2008.09.017
- 669 60. Sveen A, Kilpinen S, Ruusulehto A, Lothe RA, Skotheim RI. Aberrant RNA splicing in  
670 cancer; expression changes and driver mutations of splicing factor genes. *Oncogene.*  
671 2016;35: 2413–2427. doi:10.1038/onc.2015.318
- 672 61. Faustino NA, Cooper TA. Pre-mRNA splicing and human disease. *Genes and*  
673 *Development.* Cold Spring Harbor Lab; 2003. pp. 419–437. doi:10.1101/gad.1048803
- 674 62. Xiong HY, Alipanahi B, Lee LJ, Bretschneider H, Merico D, Yuen RKC, et al. The  
675 human splicing code reveals new insights into the genetic determinants of disease. *Science*

- 676 (80- ). 2014;347: 1254806-. doi:10.1126/science.1254806  
677 63. Anders S, Pyl PT, Huber W. HTSeq-A Python framework to work with high-throughput  
678 sequencing data. *Bioinformatics*. 2015. doi:10.1093/bioinformatics/btu638  
679 64. Schafer S, Miao K, Benson CC, Heinig M, Cook SA, Hubner N. Alternative Splicing  
680 Signatures in RNA-seq Data: Percent Spliced in (PSI). *Curr Protoc Hum Genet*. 2015;87.  
681 doi:10.1002/0471142905.hg1116s87  
682 65. Lovci MT, Ghanem D, Marr H, Arnold J, Gee S, Parra M, et al. Rbfox proteins regulate  
683 alternative mRNA splicing through evolutionarily conserved RNA bridges. *Nat Struct*  
684 *Mol Biol*. 2013;20: 1434–1442. doi:10.1038/nsmb.2699  
685 66. Zhang Y, Liu T, Meyer CA, Eeckhoute J, Johnson DS, Bernstein BE, et al. Model-based  
686 Analysis of ChIP-Seq (MACS). *Genome Biol*. 2008;9: R137. doi:10.1186/gb-2008-9-9-  
687 r137  
688 67. Cho K, van Merriënboer B, Bahdanau D, Bengio Y. On the Properties of Neural Machine  
689 Translation: Encoder–Decoder Approaches. *Proc SSST-8, Eighth Work Syntax Semant*  
690 *Struct Stat Transl*. 2014; 103–111. Available: <http://arxiv.org/abs/1409.1259>  
691 68. Kingma D, Ba J. Adam: A Method for Stochastic Optimization. *Int Conf Learn Represent*.  
692 2014; 1–13. Available: <http://arxiv.org/abs/1412.6980>  
693 69. Theano Development Team. Theano: A Python framework for fast computation of  
694 mathematical expressions. *arXiv e-prints*. 2016; 19. Available:  
695 <http://arxiv.org/abs/1605.02688>  
696  
697

## 698 **Supporting Information Legend**

### 699 **Supplementary Table 1**

700 **List of datasets and the accession numbers used for the study.**

701

### 702 **Supplementary Table 2**

703 **Overview of dataset used for training the ESPRNN model.** The model was trained using the

704 CORE (highlighted in red) and FULL set based on the availability of data. The CORE set was

705 used to compare the predictive performance across cell types.

706

### 707 **Supplementary Table 3**

708 **ESPRNN model prediction performance measured by F1 score.** Predictive performance was

709 compared between the CORE and FULL set of genomic features. For each set, performance was



710 compared using LSTM, GRU, and simple RNN models. Predictive performance was measured  
711 by F1 score.

712

#### 713 **Supplementary Table 4**

714 **Comparison of models trained with 50 bp span and 100 bp span data.** Each model was  
715 trained using genomic features derived from 50 bp span or 100 bp span data from splice sites  
716 using the LSTM model. Performance was measured using F1 score and ROC AUC.

717

#### 718 **Supplementary Figure 1**

719 (Shadow figure of the main Figure 2A) Enrichment of various epigenomic marks of HepG2 at  
720 the exon-intron boundary. High PSI indicates exon inclusion, mid PSI indicates exons with 40-  
721 60% PSI, and low PSI indicates exon skipping.

722

#### 723 **Supplementary Figure 2**

724 (Shadow figure of the main Figure 2B) Comparison of epigenetic enrichment around different  
725 segments of the 3' acceptor site for **(A)** K562 and **(B)** HepG2. High PSI indicates exon inclusion,  
726 mid PSI indicates exons with 40-60% PSI, and low PSI indicates exon skipping. Mann-Whitney-  
727 Wilcoxon two-sided test, ns:  $0.05 < p \leq 1$ ; \*:  $0.01 < p \leq 0.05$ ; \*\*:  $0.001 < p \leq 0.01$ ; \*\*\*:  
728  $0.0001 < p \leq 0.001$ ; \*\*\*\*:  $p \leq 0.0001$ . **(C)** Fold enrichment of splicing-related RBPs to non-  
729 splicing-related RBPs around the 3' acceptor splice site and 5' donor splice site.

730

#### 731 **Supplementary Figure 3**

732 Correlation of exonic expression (FPKM) and histone enrichment of (A) HepG2 H3K36me3, (B)  
733 HepG2 H3K27me3, (C) liver H3K36me3, and (D) liver H3K27me3. PCC: Pearson Correlation  
734 Coefficient.

735

#### 736 **Supplementary Figure 4**

737 Splicing patterns based on exonic expression level (FPKM) for diverse ENCODE cell types are  
738 projected on a PCA cell space.

739

#### 740 **Supplementary Figure 5**

741 (A) Difference in splicing prediction performance when RBP binding profiles were added as an  
742 additional feature of the base model containing chromatin accessibility and histone marks. (B)  
743 Cross-cell testing of model. Model was trained on HepG2 data and tested on K562 data, and vice  
744 versa.

745

#### 746 **Supplementary Figure 6**

747 (A) Comparison of the baseline model trained using chromatin accessibility and 6 histone marks  
748 to a model using DNA sequence feature only (B) Measure of information gain from additional  
749 epigenetic feature based on DNA sequence only model (C) Comparison of splicing prediction  
750 performance using a pair of epigenetic features. (D) Performance comparison of models using  
751 H3K36me3 or H3K27ac feature individually to a model using both H3K36me3 and H3K27ac  
752 features. Performance was measured based on F1 score from 5 trials.

753

#### 754 **Supplementary Figure 7**

755 Comparison of LSTM-based model with other machine learning algorithms. Four different  
756 algorithms, k-Nearest neighbor (kNN), decision tree, random forest, and support vector machine  
757 (SVM), were compared to the LSTM-based model across four different tissue types (A549,  
758 HepG2, GM12878, K562).

759

### 760 **Supplementary Figure 8**

761 **(A)** Comparison of splicing prediction performance across different sizes of hidden state. **(B)**  
762 Loss of training an LSTM model with 1 hidden layer for 400 epochs. **(C)** Accuracy of training an  
763 LSTM model with one hidden layer for 400 epochs. **(D)** Trained weights of LSTM recurrent  
764 cells.

765

### 766 **Supplementary Figure 9**

767 Comparison of splicing prediction performance when epigenetic context features are reversed in  
768 time-direction. **(A)** precision-recall curve for HepG2 **(B)** ROC curve for HepG2 **(C)** precision-  
769 recall curve for K562 **(D)** ROC curve for K562

770

### 771 **Supplementary Figure 10**

772 PSI histogram of cassette exons from **(A)** HepG2 **(B)** mammary epithelial cell **(C)** K562, and **(D)**  
773 bipolar neuron.

774

### 775 **Figure Legend**

776 **Figure 1**

777 Overview of the co-transcriptional splicing model. Depiction of co-transcriptional splicing in  
778 terms of **(A)** biological context, **(B)** genomic and epigenomic data context, and how it relates to  
779 the **(C)** RNN model.

780

781 **Figure 2**

782 **(A)** Enrichment of various epigenomic marks of K562 at the exon-intron boundary. We  
783 aggregated histone modifications up to 500 bp upstream and downstream of intronic and exonic  
784 regions flanking 3' and 5' SSs for cassette exons across ENCODE cell types. High PSI indicates  
785 exon inclusion, mid PSI indicates exons with 40-60% PSI, and low PSI indicates exon skipping.  
786 **(B)** Statistical significance testing of epigenetic mark enrichment. Average histone modification  
787 enrichment at four exonic segments were compared based on PSI values. Mann-Whitney-  
788 Wilcoxon two-sided test, ns:  $0.05 < p \leq 1$ ; \*:  $0.01 < p \leq 0.05$ ; \*\*:  $0.001 < p \leq 0.01$ ; \*\*\*:  
789  $0.0001 < p \leq 0.001$ ; \*\*\*\*:  $p \leq 0.0001$ . **(C)** RBP enrichment across the exon-intron boundary.

790

791 **Figure 3**

792 Correlation of exonic expression to **(A)** H3K36me3 and **(B)** H3K27me3. The line represents a  
793 linear regression model fit, and the shaded band represents 95% confidence interval. **(C)**  
794 Alternative exons were grouped by expression level and their relative histone enrichment was  
795 compared near the SSs. Asterisks represents statistical significance using the Wilcoxon rank sum  
796 test; (\*)  $P \leq 0.05$ , (\*\*)  $P \leq 0.01$ , (\*\*\*)  $P \leq 0.001$ , (\*\*\*\*)  $P \leq 0.0001$ . **(D)** Hierarchical  
797 clustering of similarity based on PSI across 49 ENCODE biosamples. The results are clustered  
798 into five categories of cell types.

799

800 **Figure 4**

801 **(A)** Overview of the ESPRNN model. The model is composed of two recurrent layers. Inputs  
802 from 3' and 5' SSs are separately processed in the first recurrent layer and then merged in the  
803 next recurrent layer. A softmax classifier is used to determine the inclusion of the exon. Using  
804 genomic sequences and epigenomic contexts as input, the alternative usage of the exon is  
805 predicted. **(B)** Precision-recall curves from six different ENCODE cell types. **(C)** Epigenetic  
806 features that contribute to splicing regulation. The order and magnitude of importance was  
807 determined using leave-one-out analysis and loss of the ROC AUC was calculated when training  
808 the model lacking a particular feature. **(D)** Comparison of LSTM model with other models based  
809 on k-nearest neighbor, support vector machine, decision tree, and random forest algorithms.

**A**

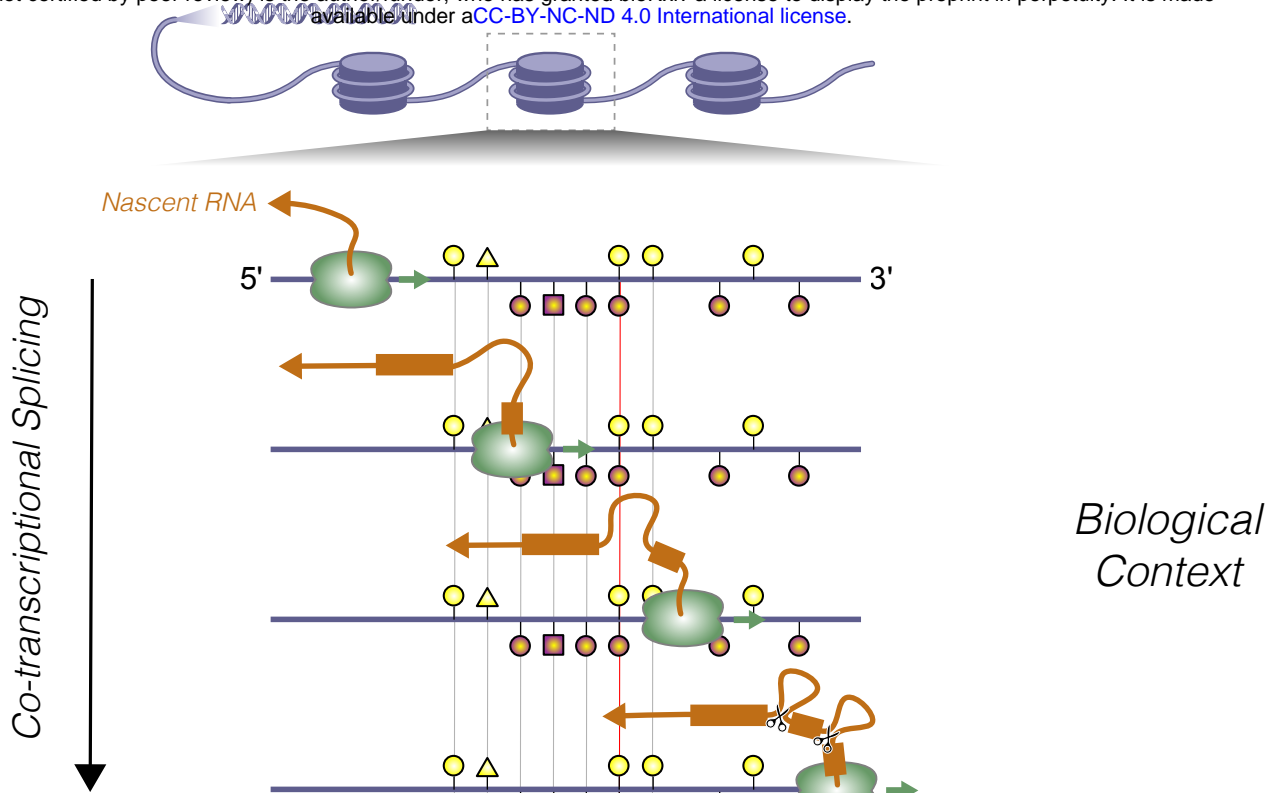

**B**

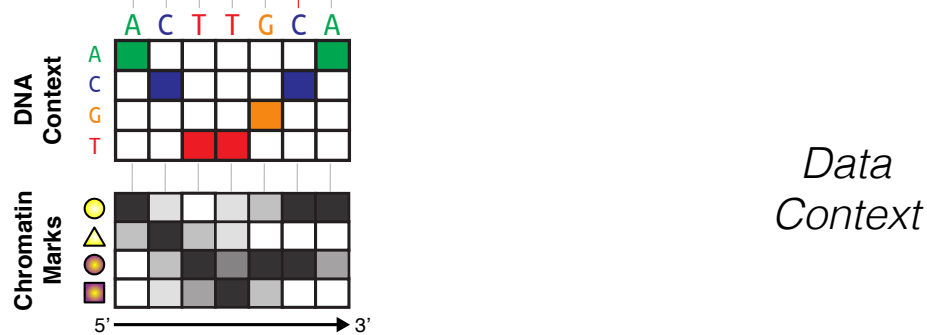

**C**

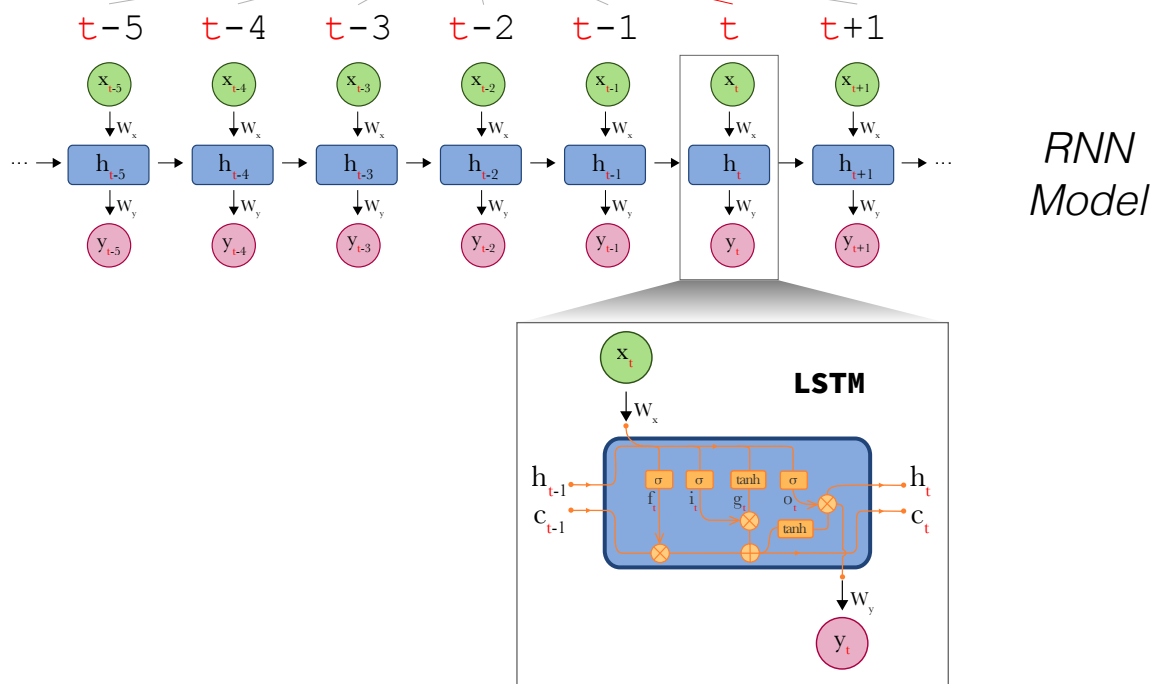

**A**

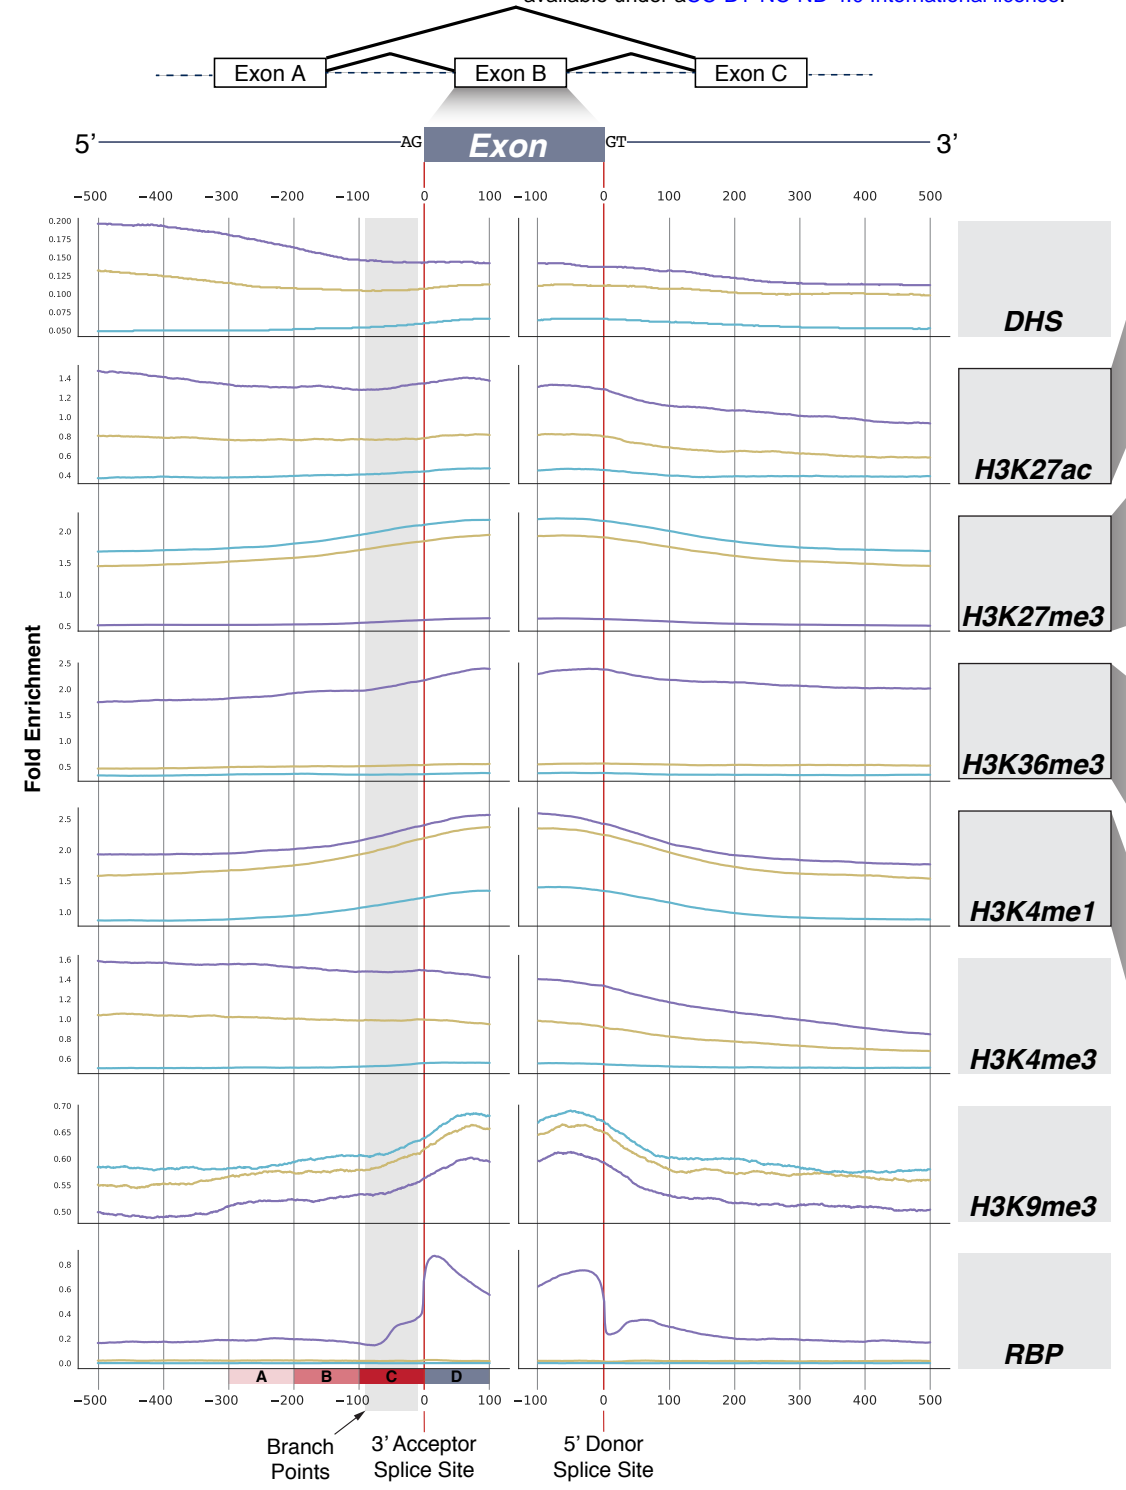

**B**

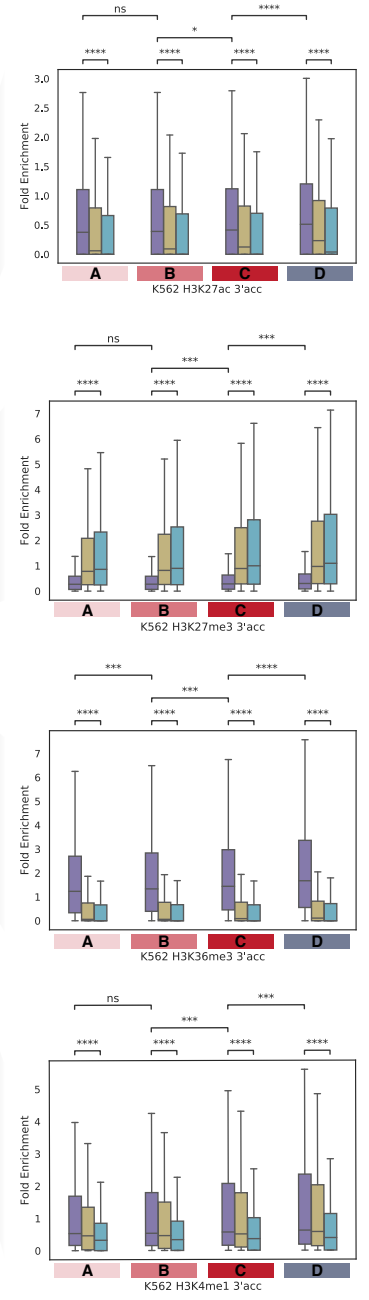

**PSI**

- 80-100% (Exon inclusion)
- 40-60%
- 0-20% (Exon skipping)

**C**

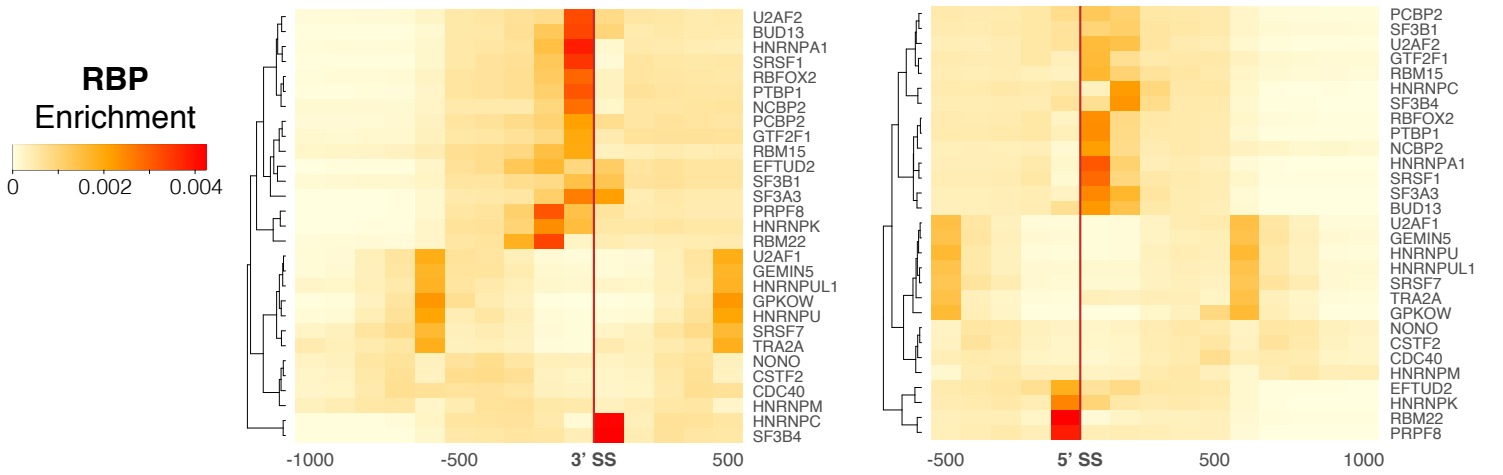

**A**

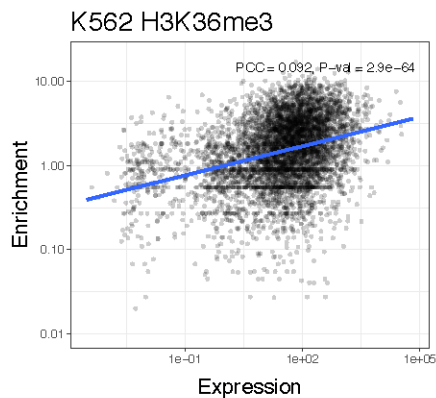

**B**

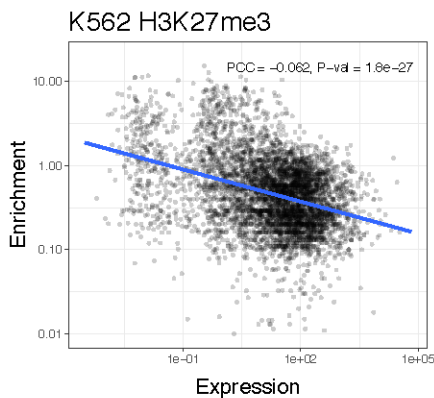

**C**

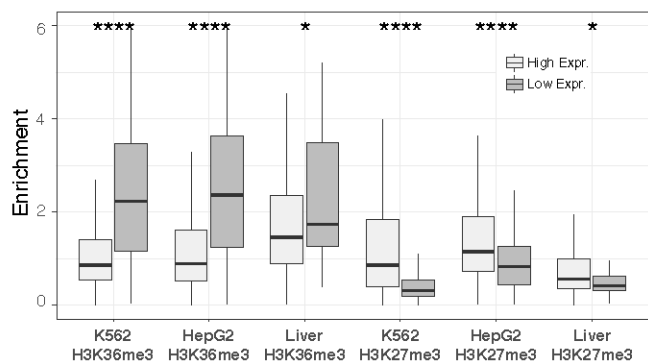

**D**

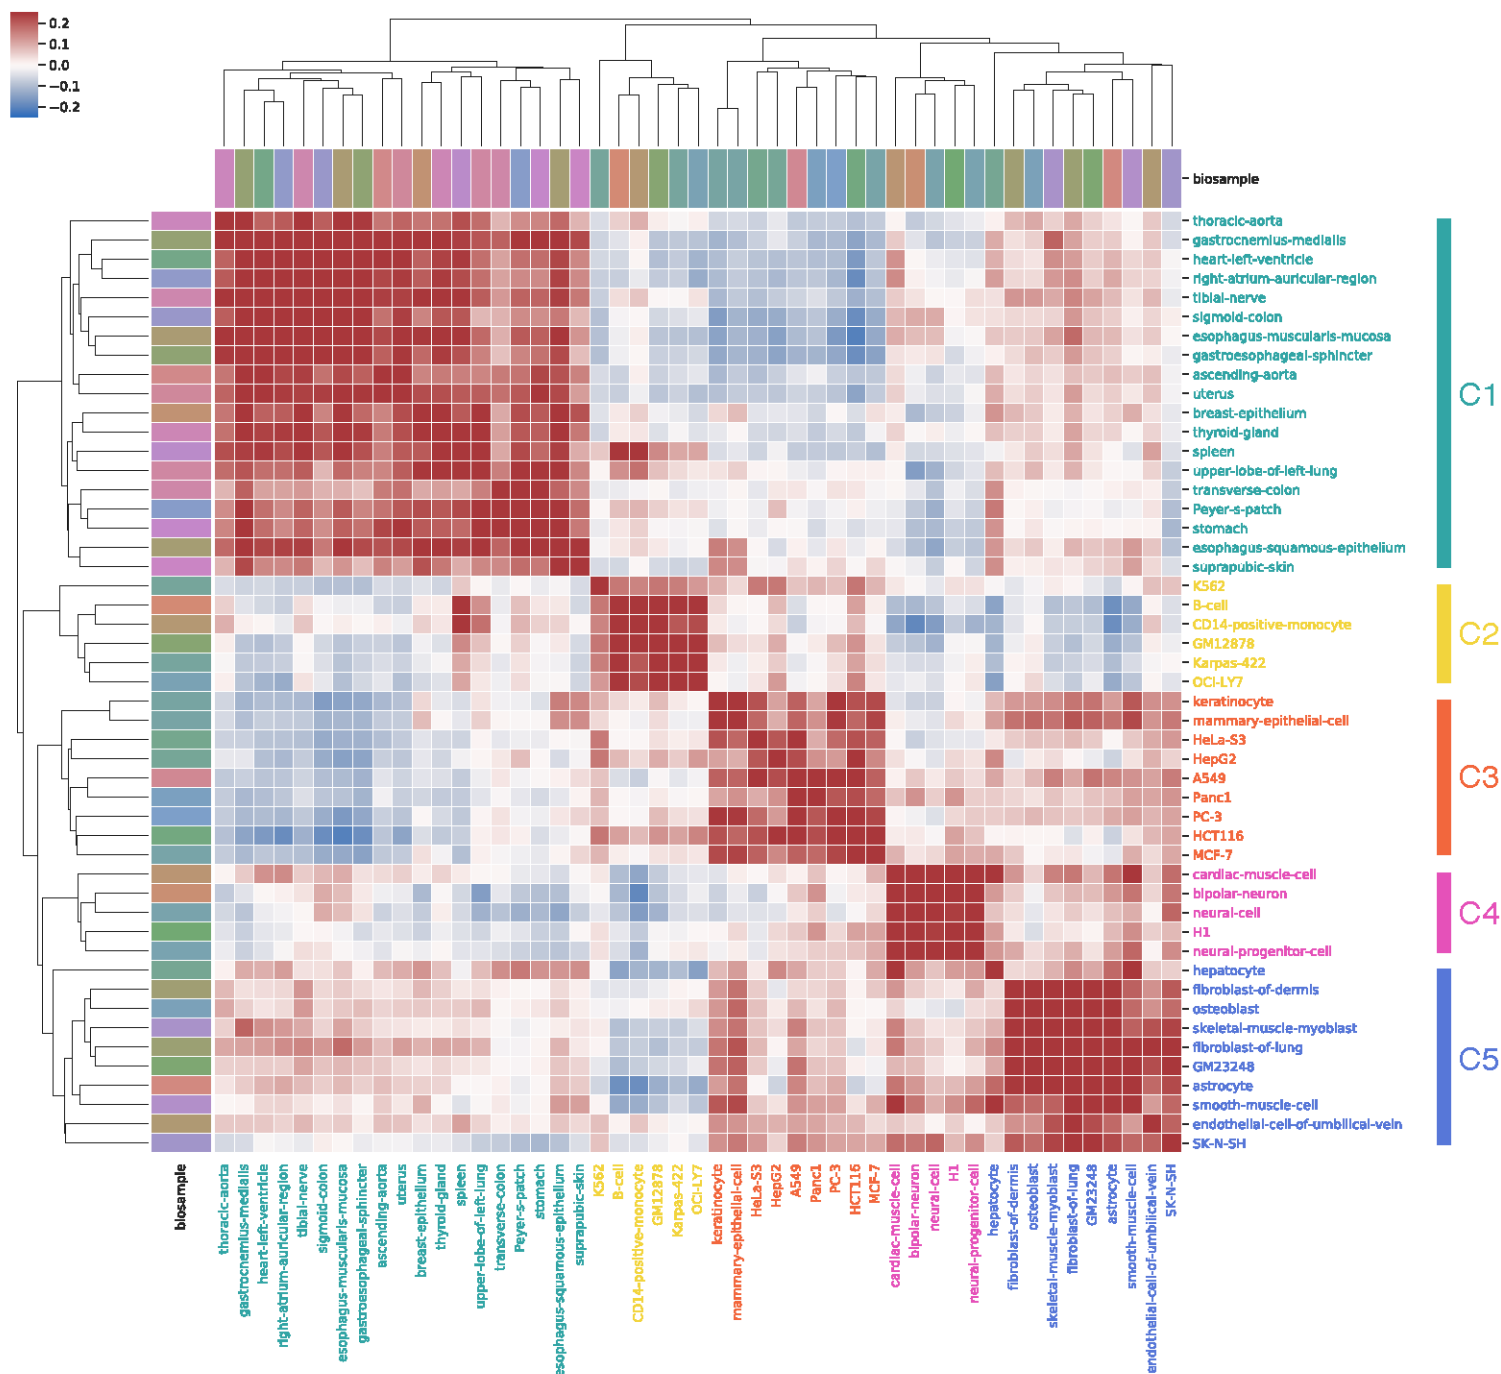



**A**

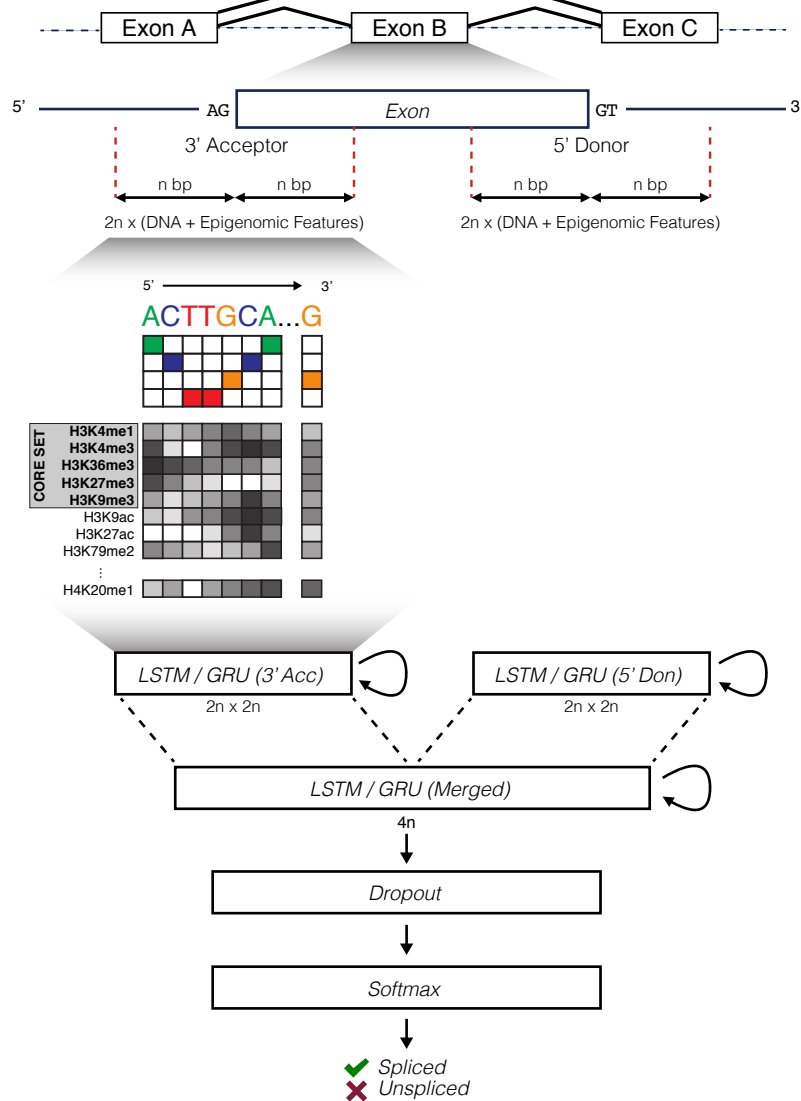

**C**

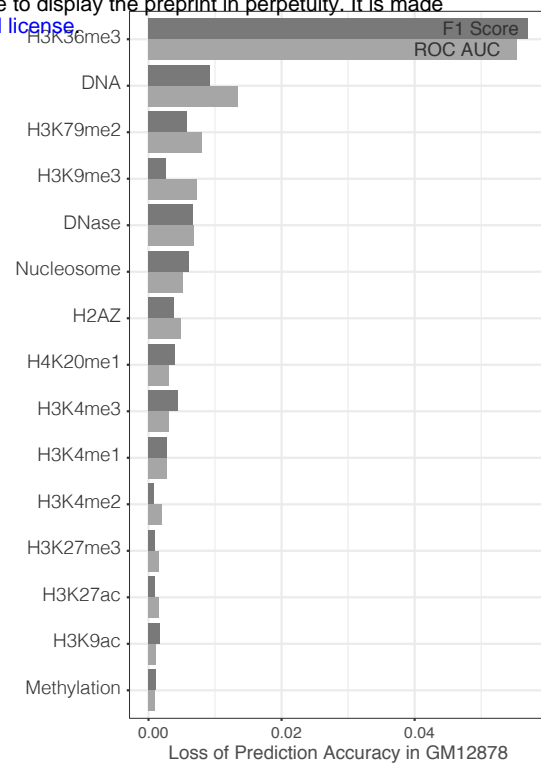

**D**

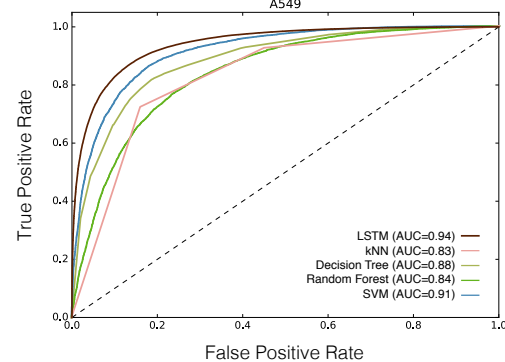

**B**

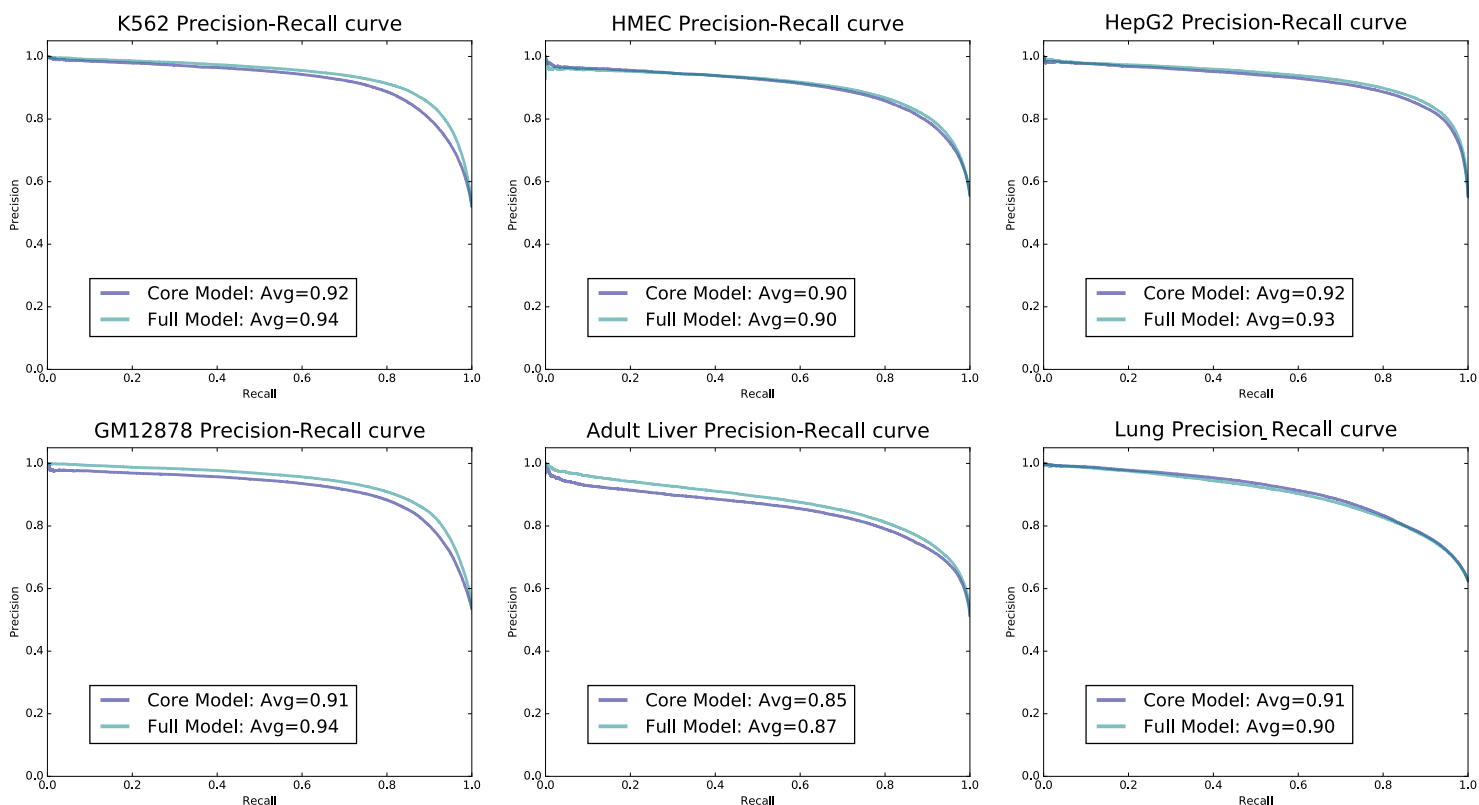

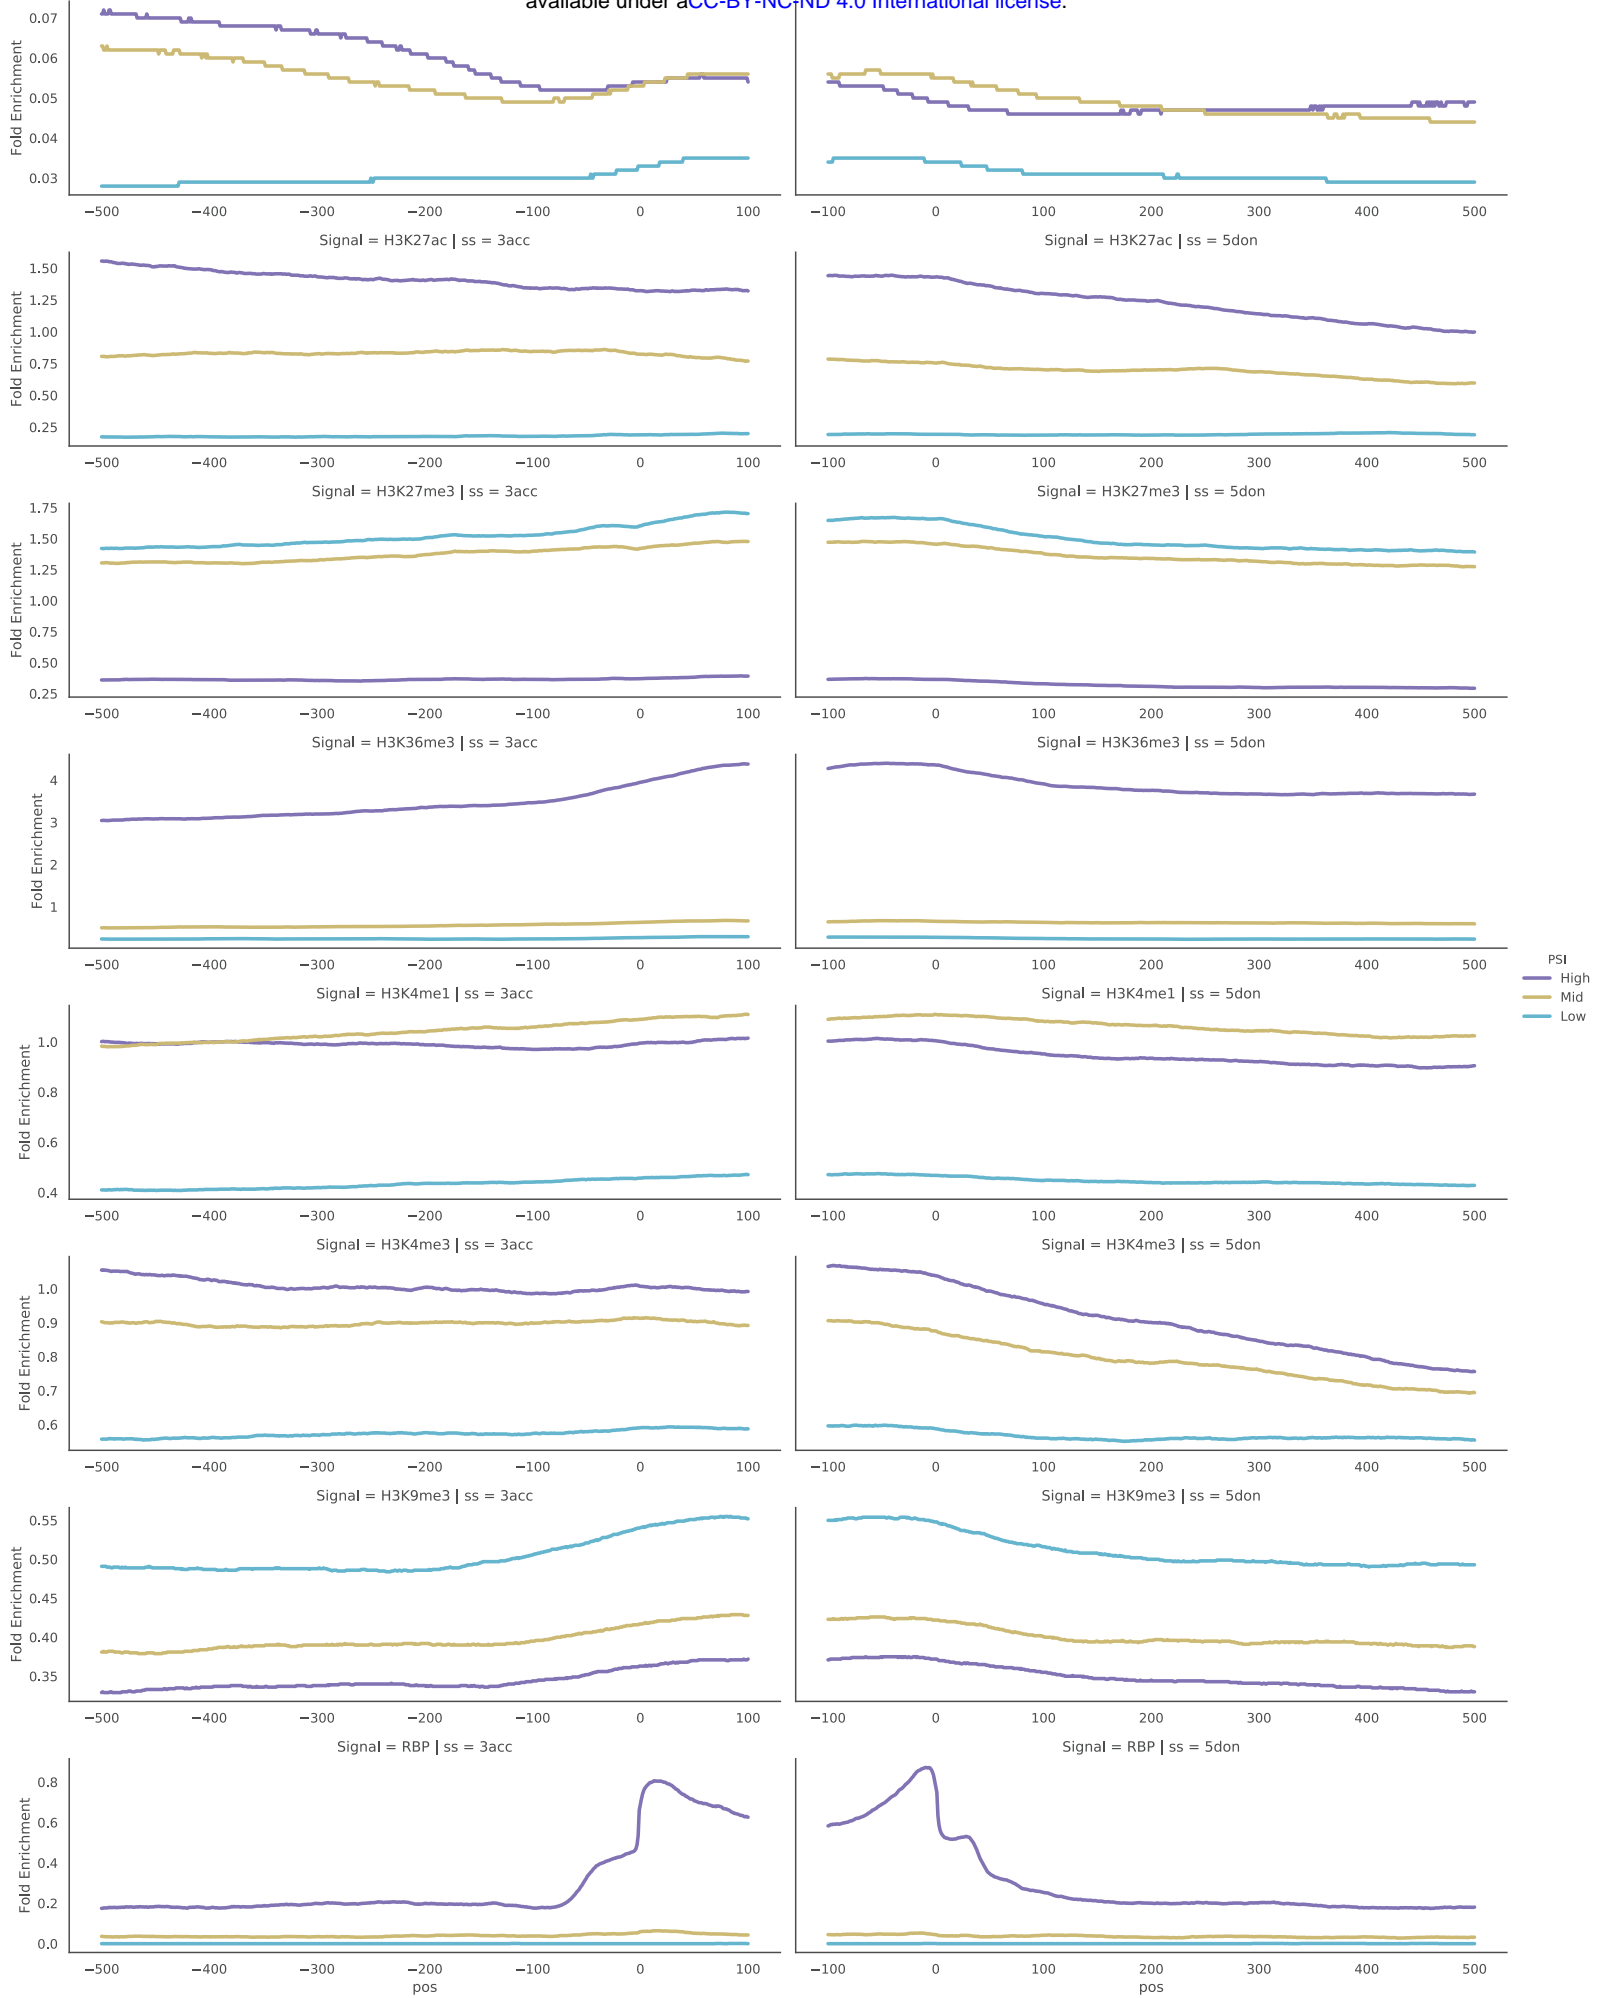

**A**

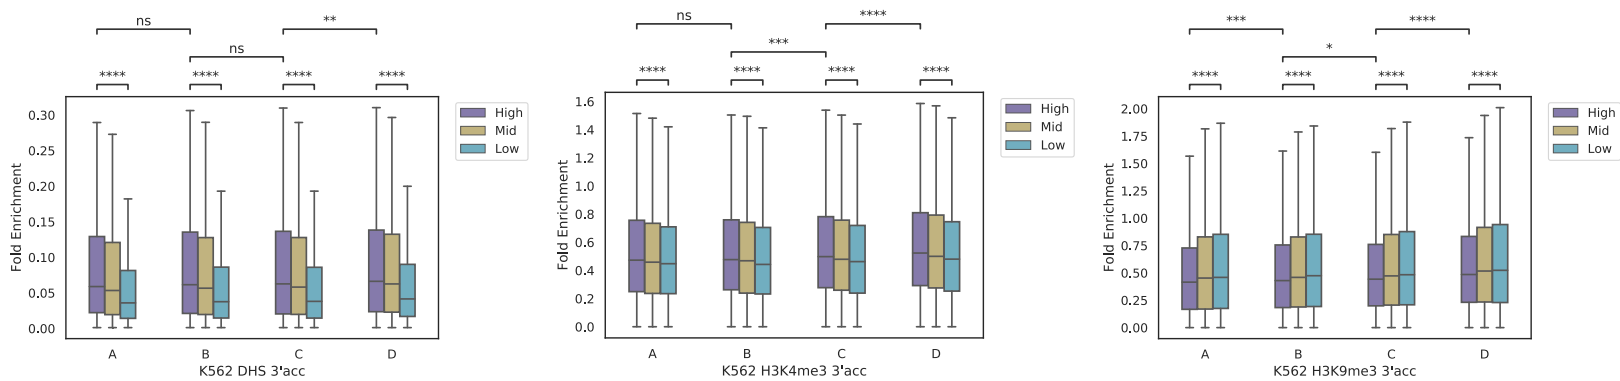

**B**

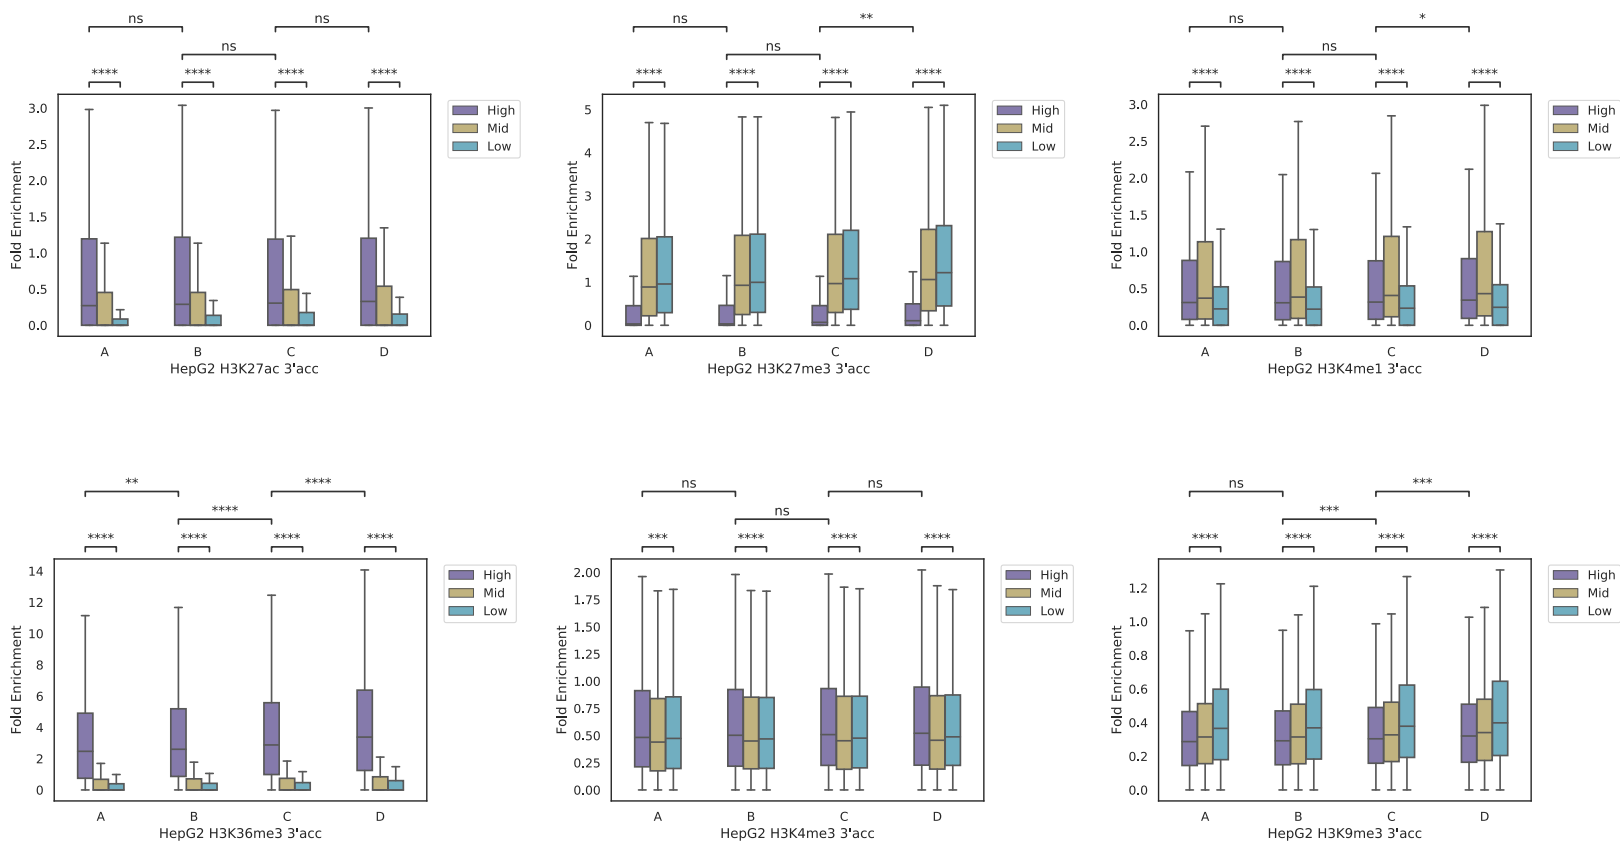

**C**

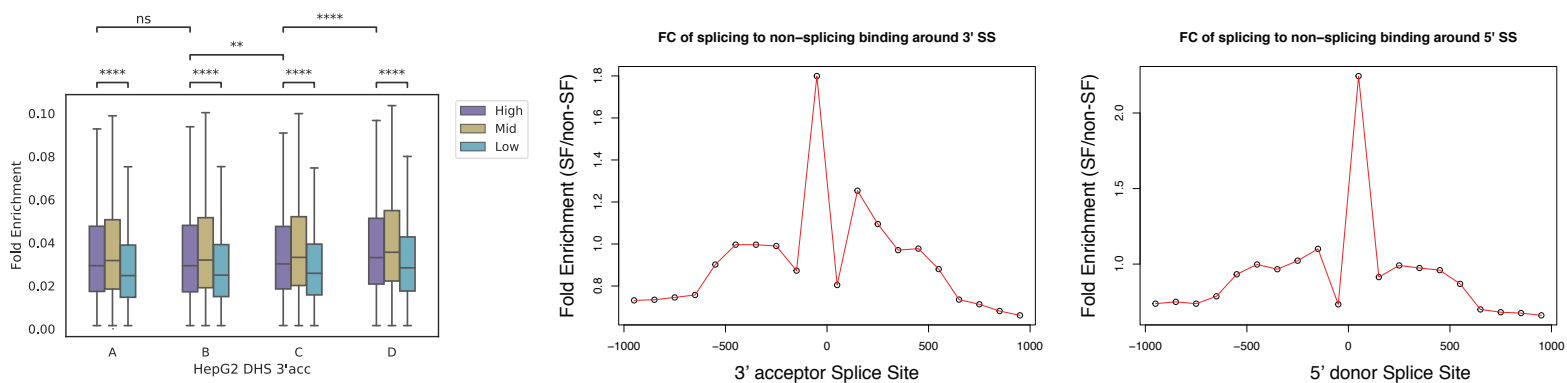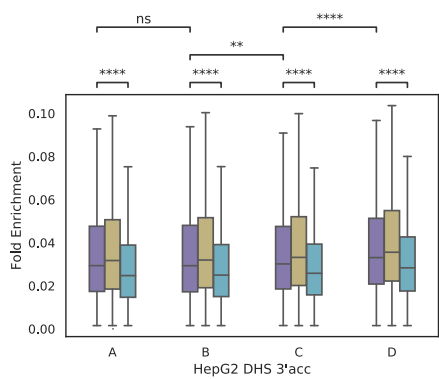

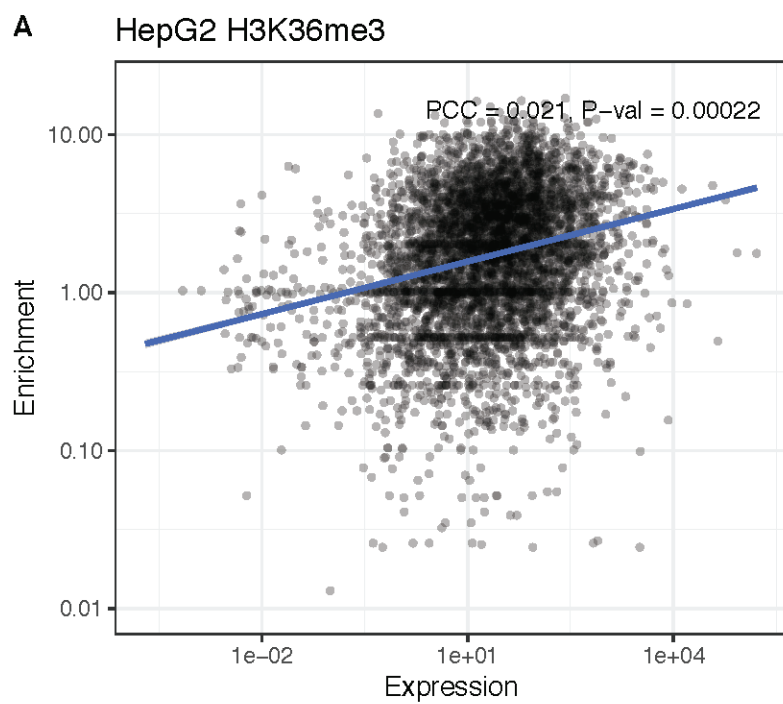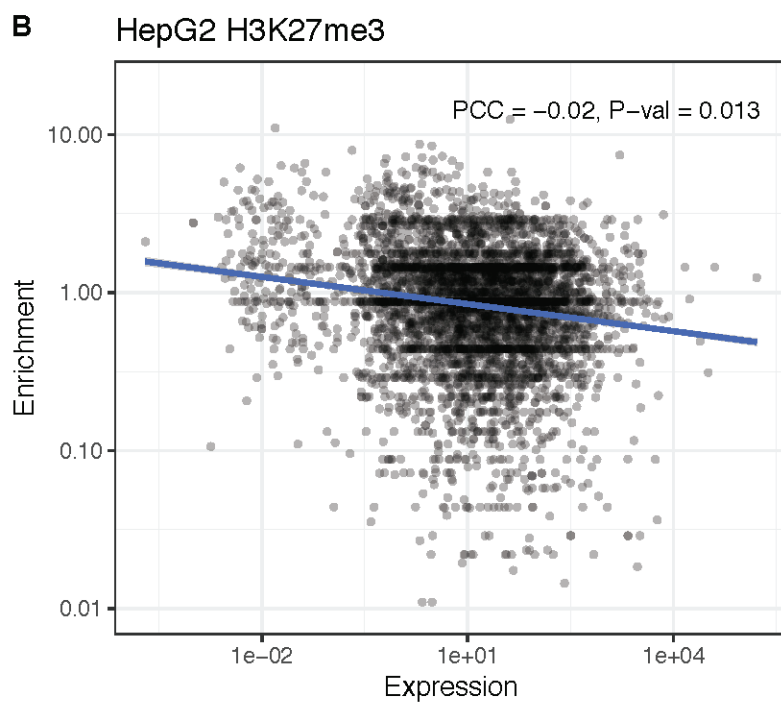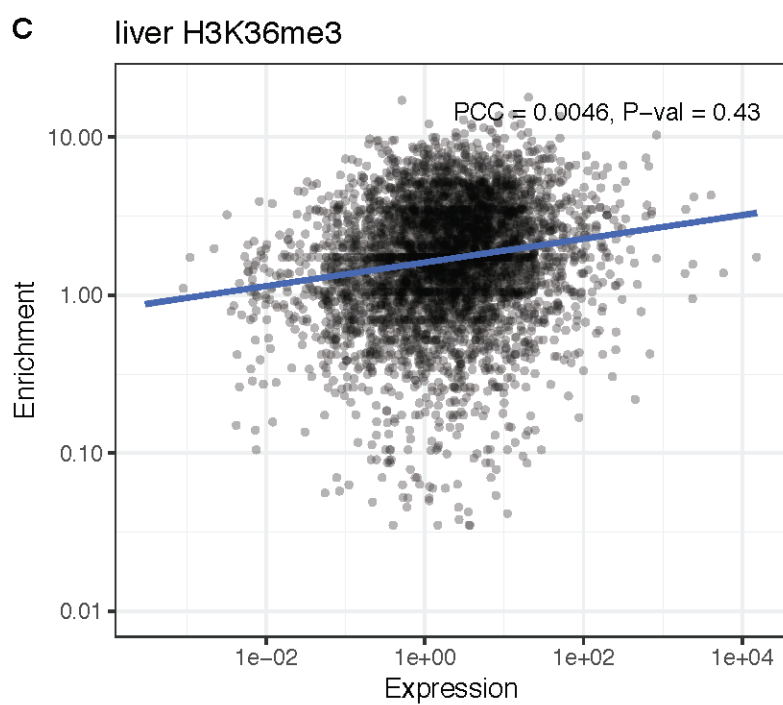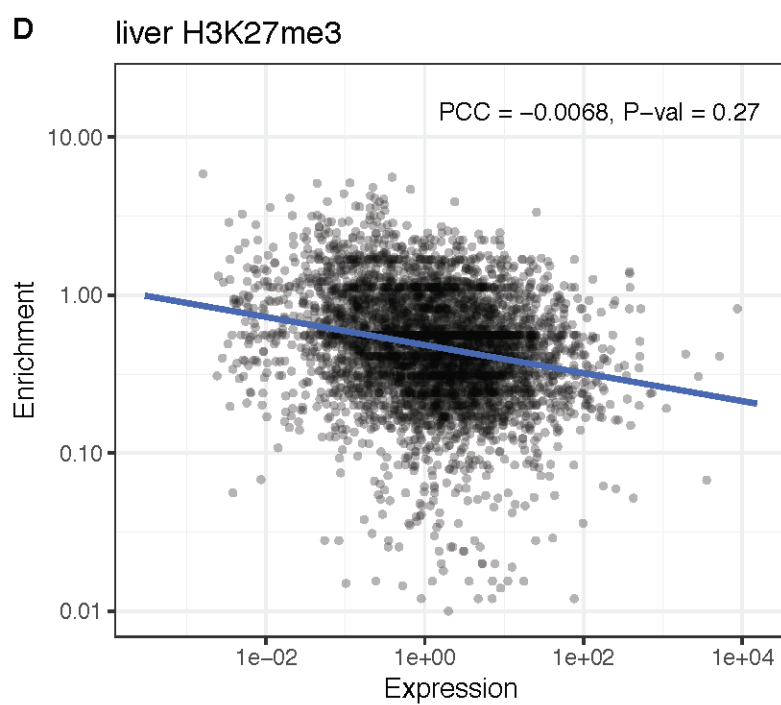

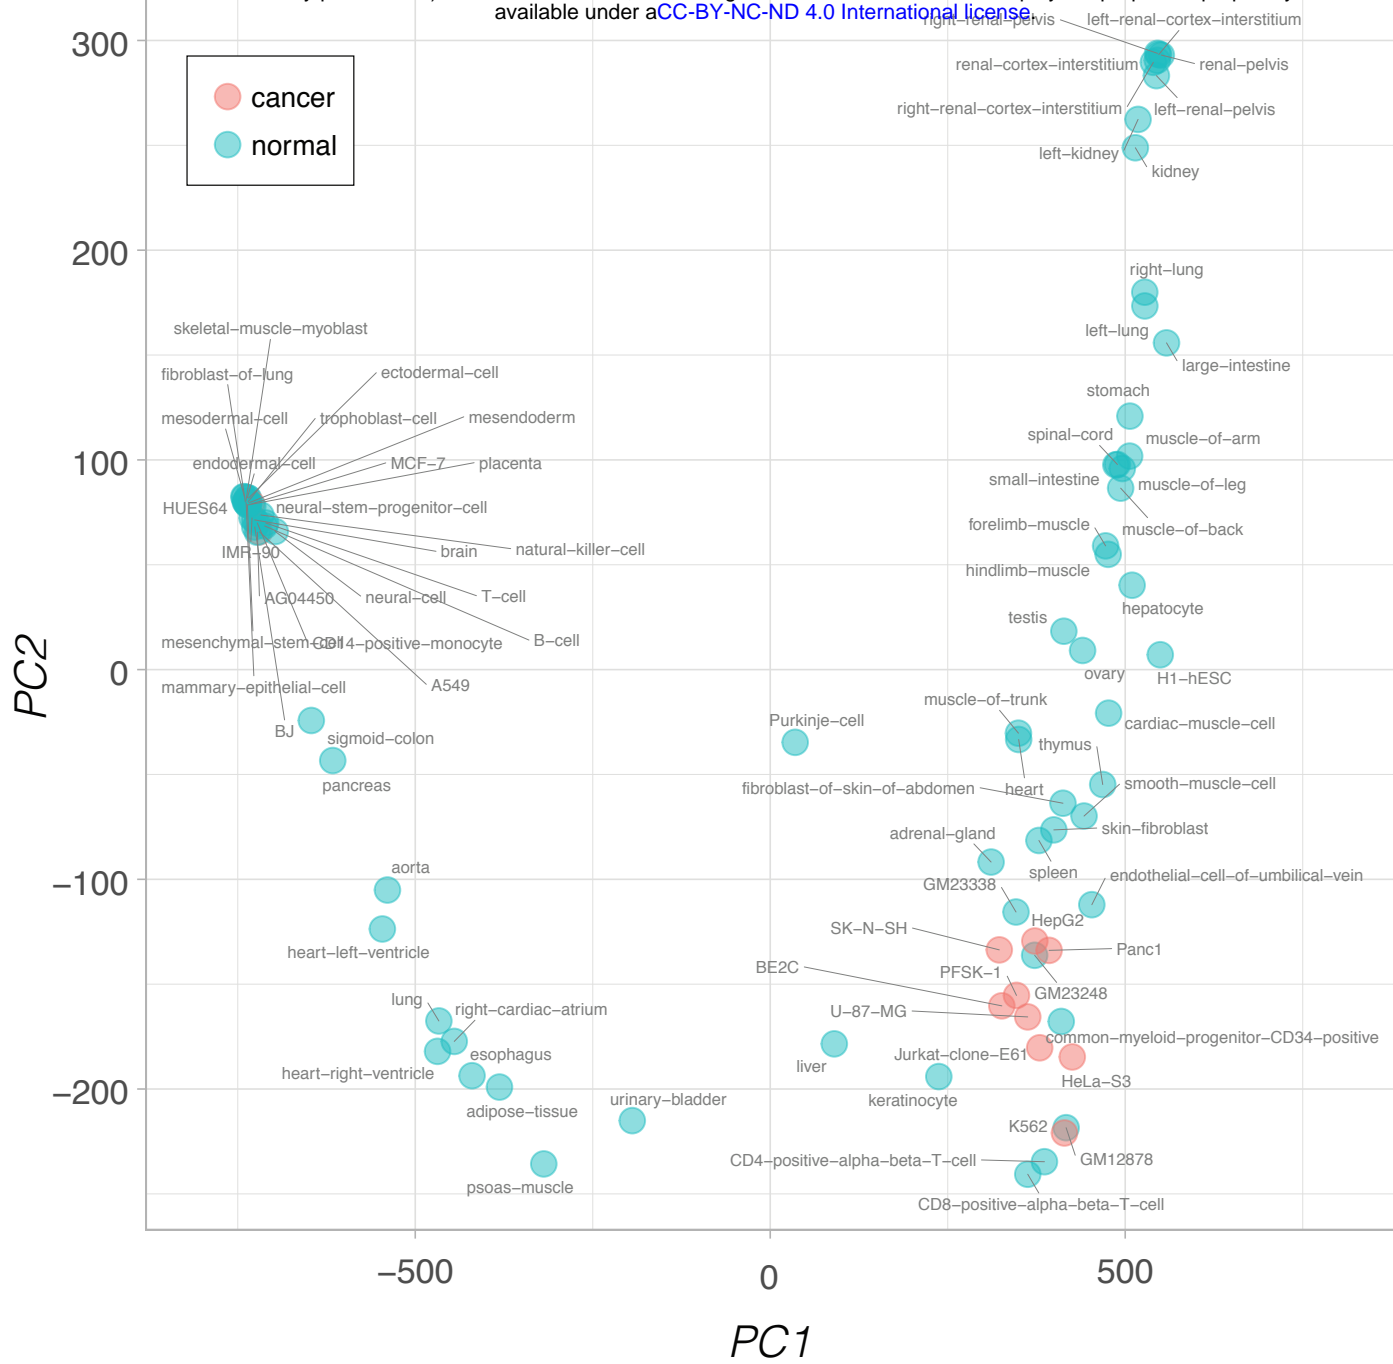

**A**

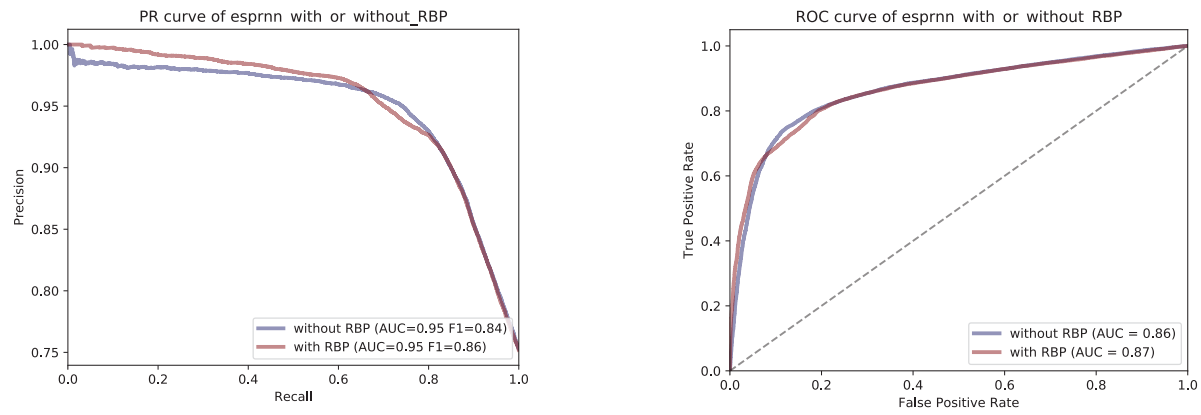

**B**

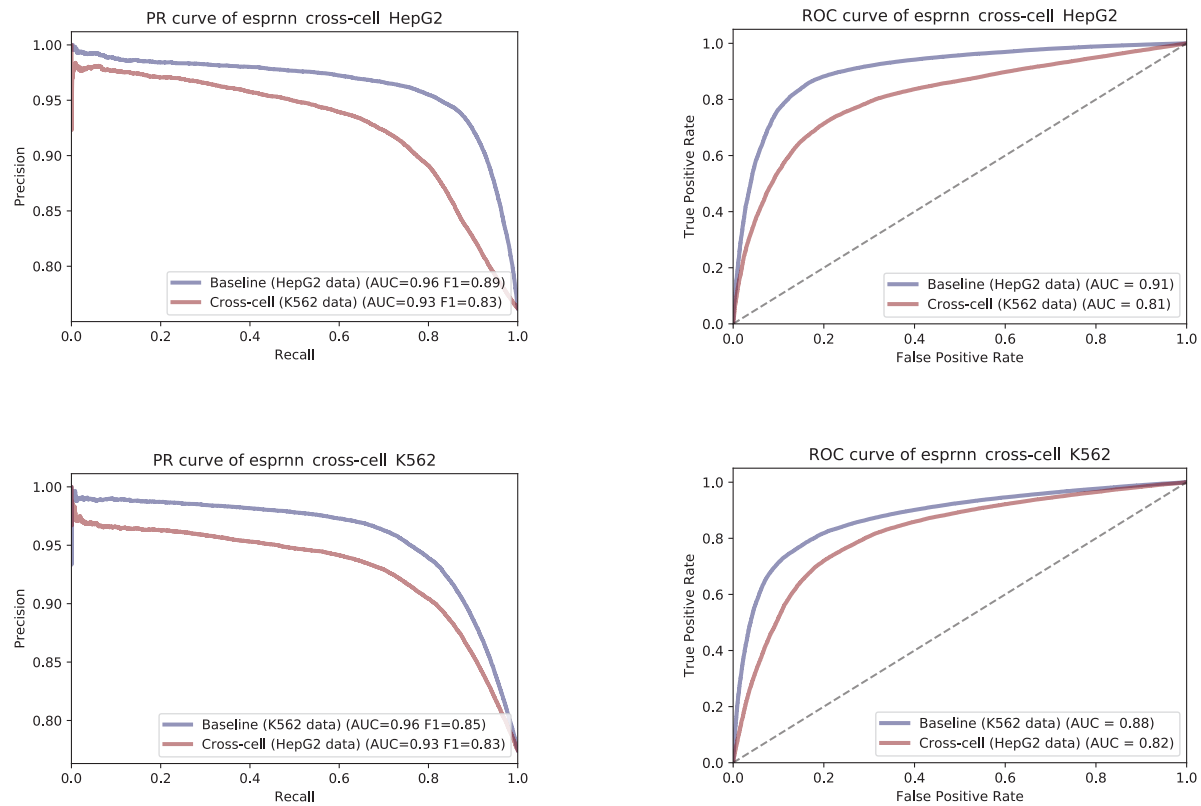

**A**

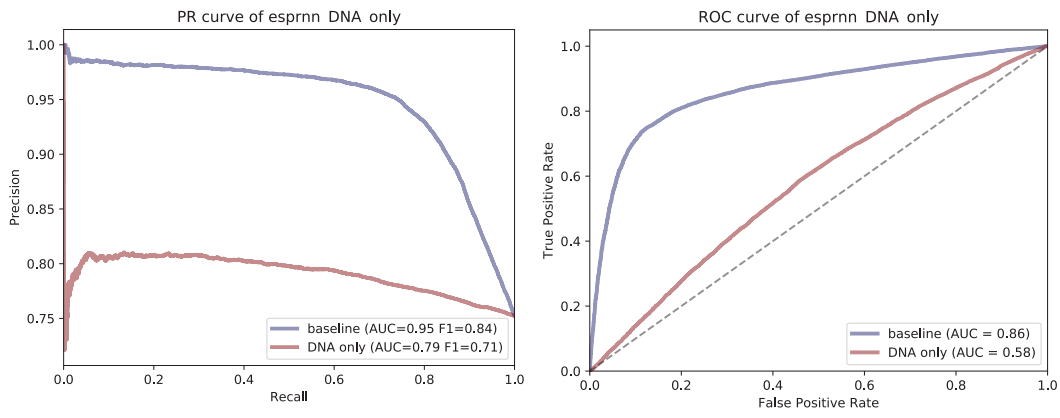

**B**

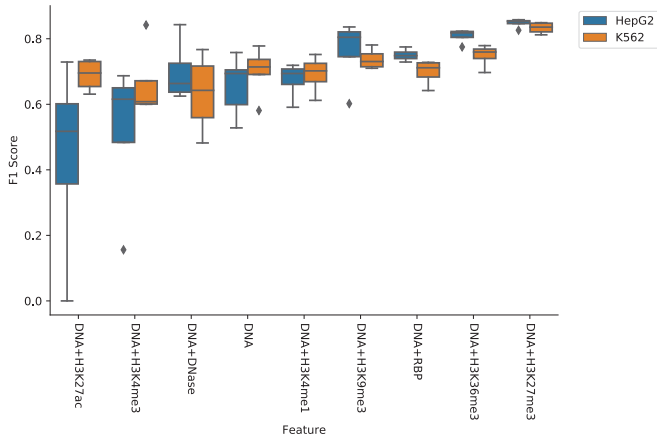

**C**

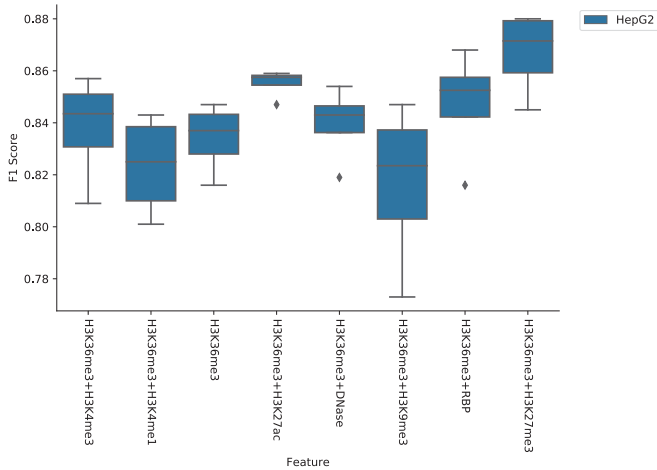

**D**

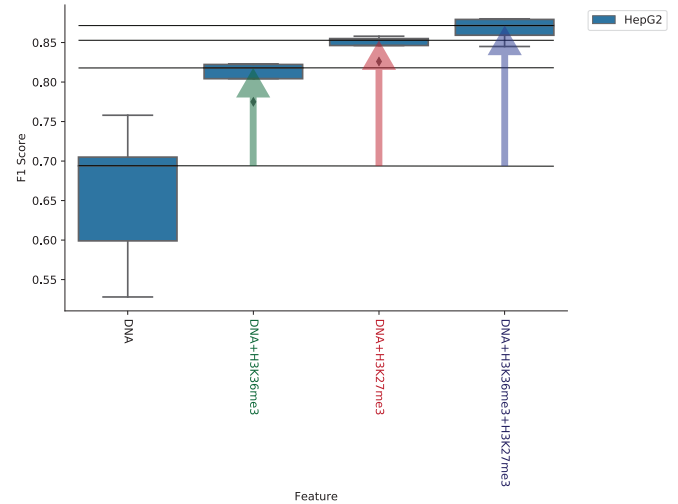

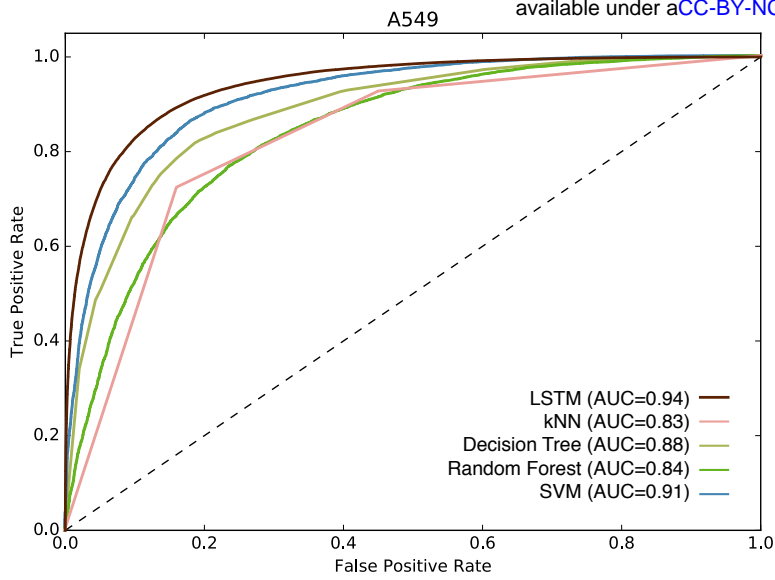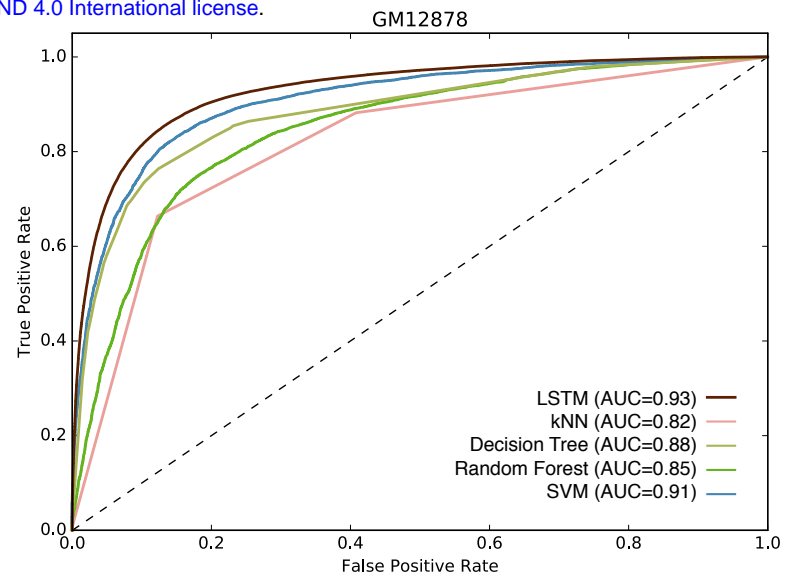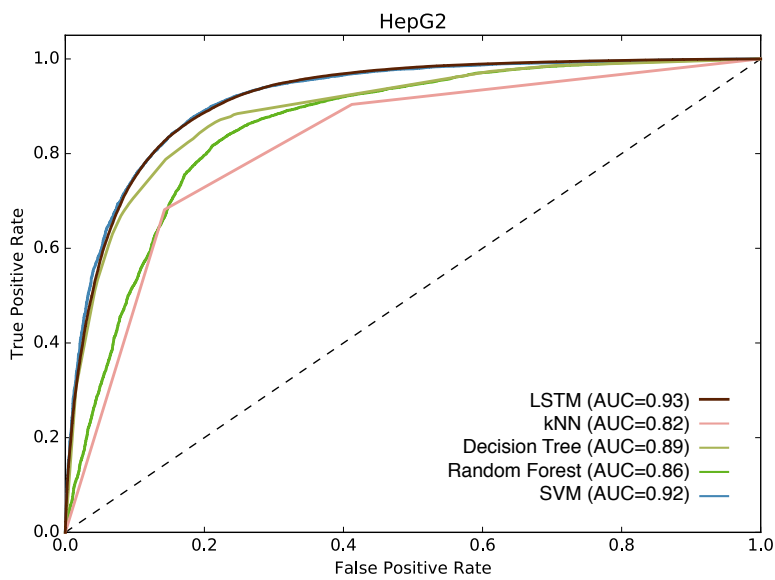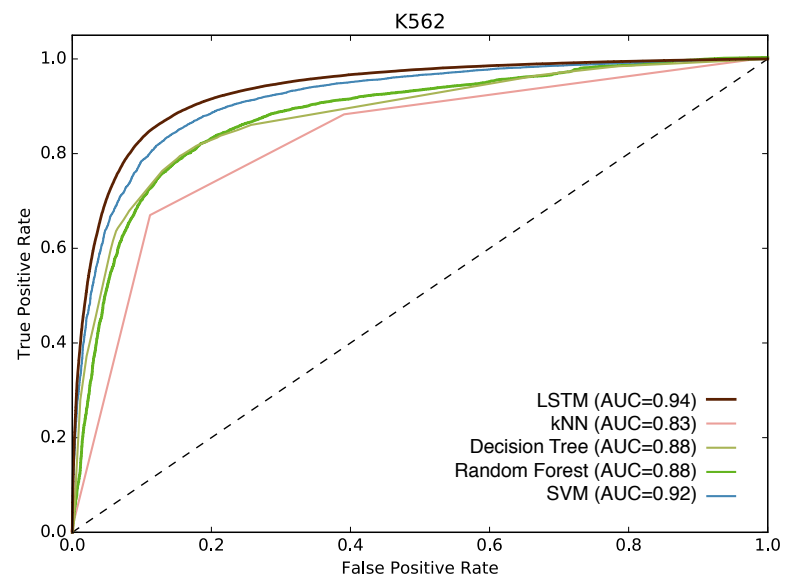



**A**

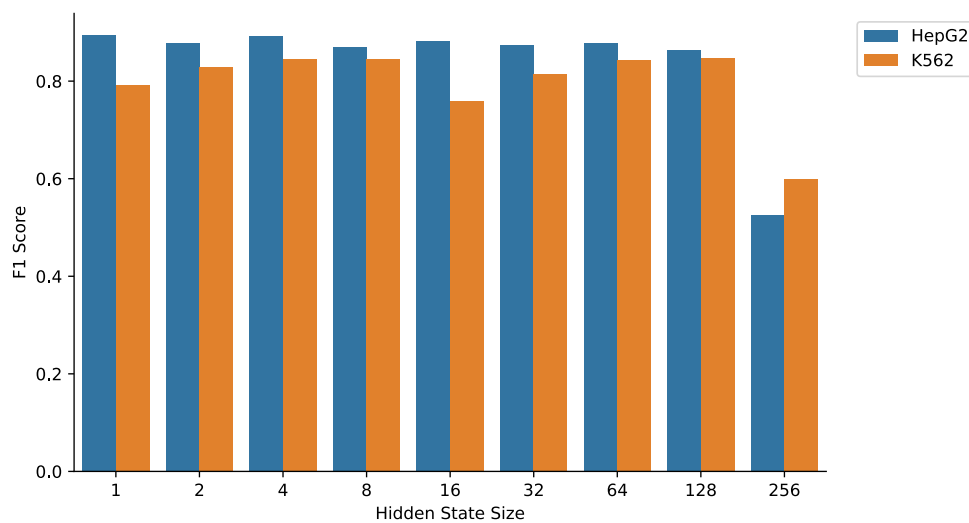

**B**

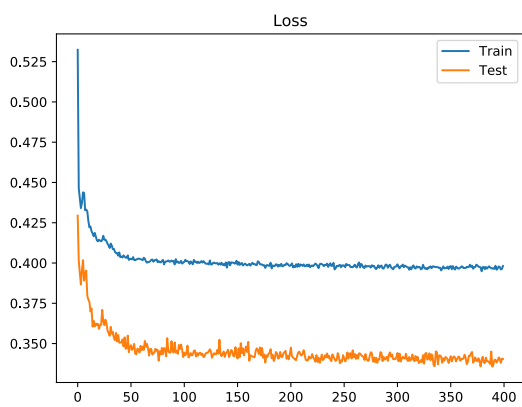

**C**

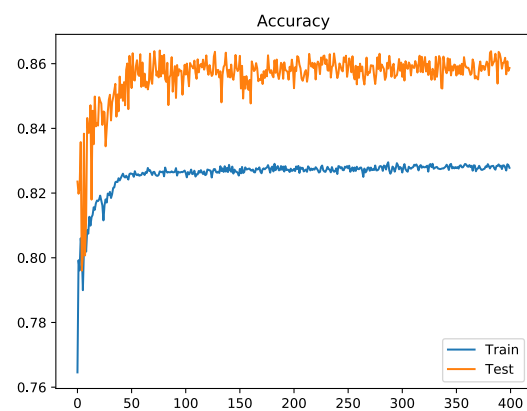

**D**

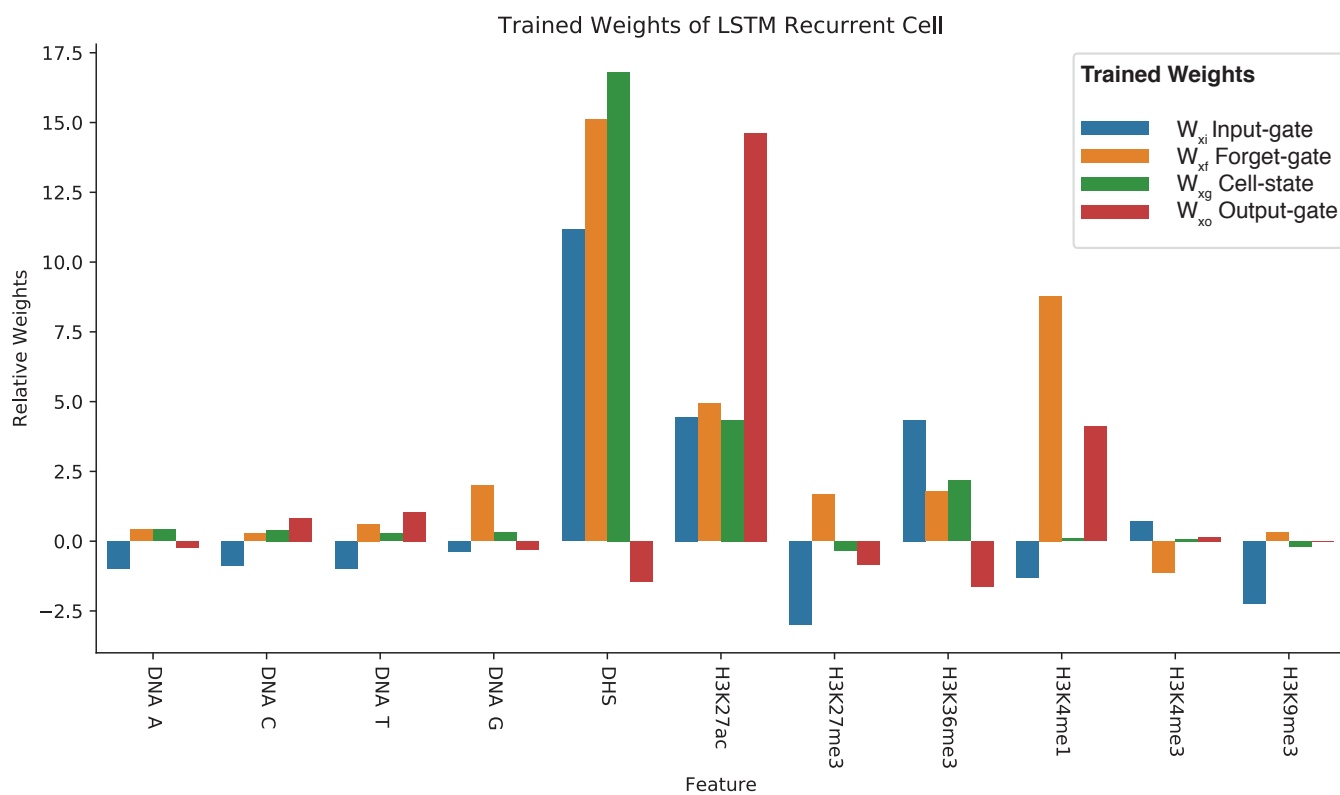

**A**

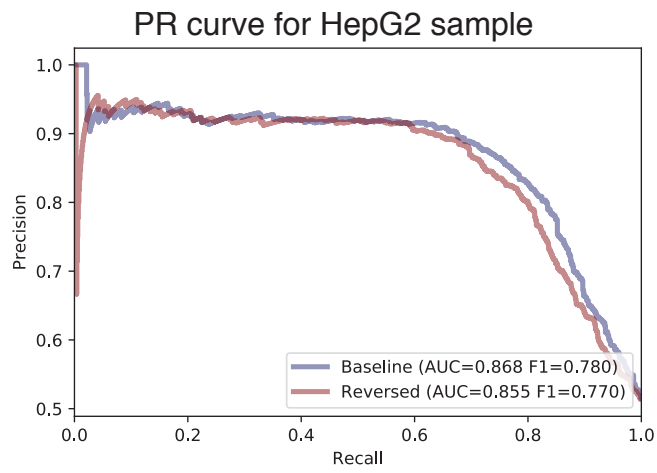

**B**

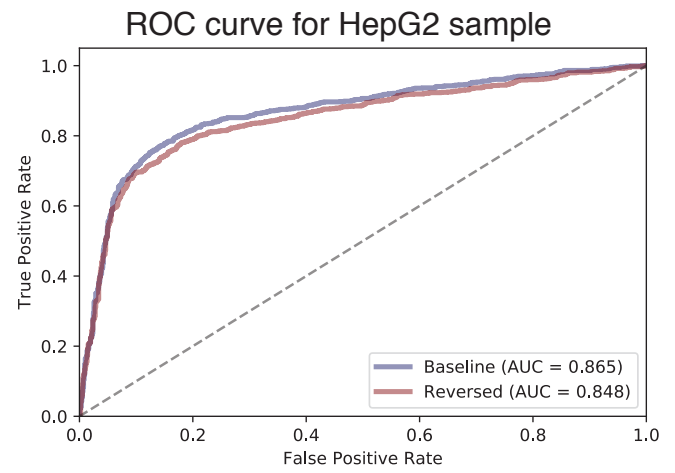

**C**

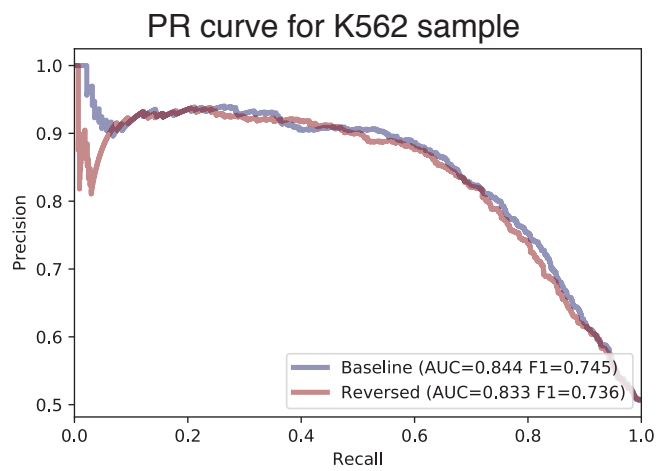

**D**

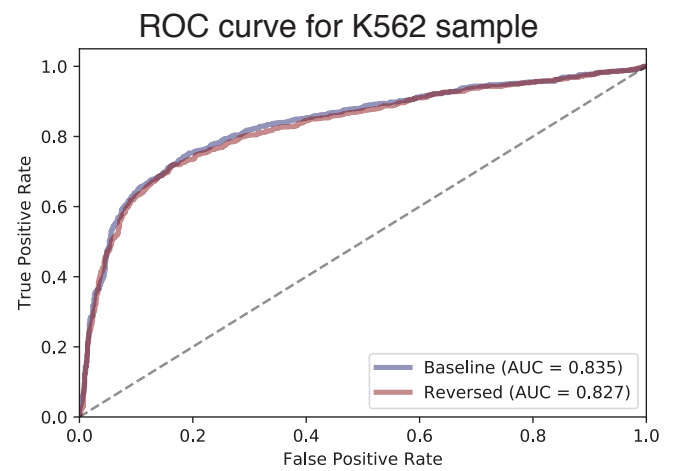

**A**

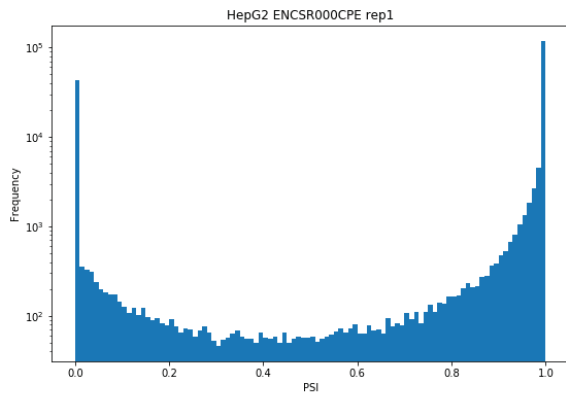

**B**

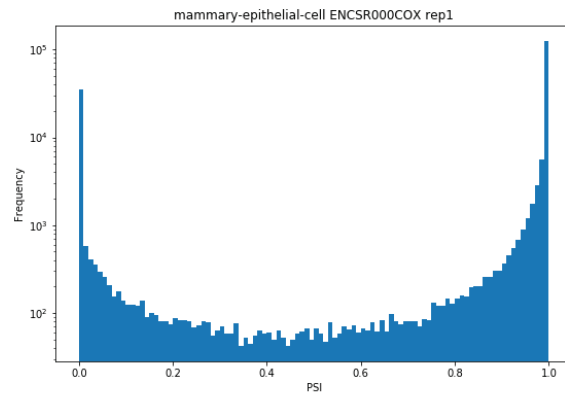

**C**

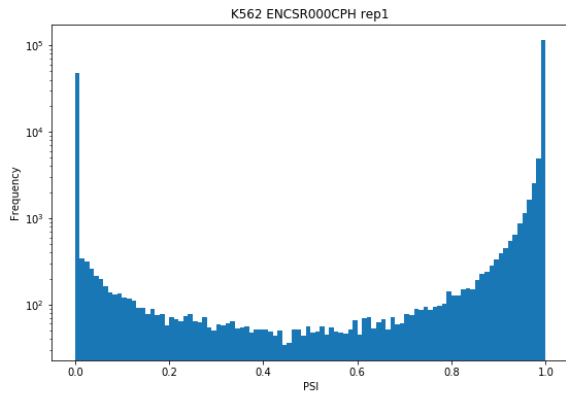

**D**

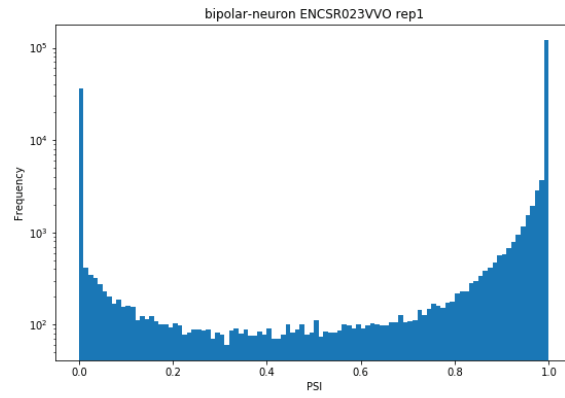

Source: https://www.biorxiv.org/content/10.1101/2020.02.03.932251v2.full.pdf
